# Supplementary material for: A Genome-Wide Metabolic QTL Analysis in Europeans Implicates Two Loci Shaped by Recent Positive Selection
Source: PLoS Genet. 2011 Sep 8;7(9):e1002270. doi: 10.1371/journal.pgen.1002270 (PMC3169529; doi:10.1371/journal.pgen.1002270)
Supplement: Table S1 — Details of statistical association between each mQTL-driven metabolite and the SNPs within 200 kb of its hit region. Genomic locations are given in NCBI build 37 coordinates. Columns labelled ‘Beta,’ ‘S.E. Beta’ (S.E. = standard error) and ‘p-value’ (for the test of the null hypothesis that ) give details of the fit of the non-Bayesian mixed-effects model described in section ‘Mixed-effects analysis of hit regions (MolTWIN 1H NMR data)’ of Materials and Methods . The meaning of the column ‘Genome-Wide Significant’ is described in the final paragraph of the section ‘Genome-wide association scan (MolTWIN 1H NMR data)’ of Materials and Methods . (XLS) [file pgen.1002270.s008.xls]

## Sheet: Sheet1
Table S1: Details of statistical association between each mQTL-driven metabolite and the SNPs within 200 kb of its hit region
Metabolite ID	SNP	Ref./Alt. Allele	Chr	Position	Beta	S.E. Beta	p-value	Genome-Wide Significant
TMAu	rs10509719	T/C	10	99934334	-0.514319	0.200084	0.0118785	FALSE
TMAu	rs9420721	T/C	10	99936182	-0.0888615	0.149963	0.567867	FALSE
TMAu	rs10883050	T/C	10	99943568	-0.37359	0.14251	0.0113201	FALSE
TMAu	rs7901698	T/C	10	99944765	-0.0262001	0.170086	0.878148	FALSE
TMAu	rs1325494	G/C	10	99946220	-0.100177	0.145644	0.498463	FALSE
TMAu	rs1252920	G/A	10	99947771	-0.0888615	0.149963	0.567867	FALSE
TMAu	rs17109059	G/C	10	99948236	0.0262001	0.170086	0.878148	FALSE
TMAu	rs9651448	G/A	10	99948489	0.37359	0.14251	0.0113201	FALSE
TMAu	rs12780143	G/A	10	99949813	0.0888615	0.149963	0.567867	FALSE
TMAu	rs2025626	G/A	10	99952220	0.0888615	0.149963	0.567867	FALSE
TMAu	rs7071520	G/C	10	99952534	0.0888615	0.149963	0.567867	FALSE
TMAu	rs4919182	G/A	10	99953270	0.100177	0.145644	0.498463	FALSE
TMAu	rs4919183	T/C	10	99953308	0.0888615	0.149963	0.567867	FALSE
TMAu	rs10786401	G/A	10	99953979	-0.100177	0.145644	0.498463	FALSE
TMAu	rs7082394	C/A	10	99955351	-0.100177	0.145644	0.498463	FALSE
TMAu	rs4919185	T/C	10	99958168	0.0549136	0.144038	0.712408	FALSE
TMAu	rs9420727	T/C	10	99958688	-0.0888615	0.149963	0.567867	FALSE
TMAu	rs1467644	G/A	10	99961158	0.0262001	0.170086	0.878148	FALSE
TMAu	rs11189510	G/A	10	99962273	-0.514319	0.200084	0.0118785	FALSE
TMAu	rs10509720	G/A	10	99967115	0.0888615	0.149963	0.567867	FALSE
TMAu	rs11189513	G/A	10	99969568	-0.37359	0.14251	0.0113201	FALSE
TMAu	rs10883053	T/G	10	99972123	0.37359	0.14251	0.0113201	FALSE
TMAu	rs1359509	C/A	10	99973800	-0.0262001	0.170086	0.878148	FALSE
TMAu	rs7906993	T/C	10	99974082	-0.0262001	0.170086	0.878148	FALSE
TMAu	rs4919188	T/C	10	99974814	0.0888615	0.149963	0.567867	FALSE
TMAu	rs7078393	G/A	10	99976739	0.0888615	0.149963	0.567867	FALSE
TMAu	rs2862295	T/G	10	99980072	-0.0262001	0.170086	0.878148	FALSE
TMAu	rs10748719	C/A	10	99986638	-0.100177	0.145644	0.498463	FALSE
TMAu	rs10450402	G/A	10	99990493	0.0888615	0.149963	0.567867	FALSE
TMAu	rs11189521	T/A	10	99992206	-0.0888615	0.149963	0.567867	FALSE
TMAu	rs7900103	G/C	10	99993635	0.514319	0.200084	0.0118785	FALSE
TMAu	rs10748721	T/C	10	99999343	-0.100177	0.145644	0.498463	FALSE
TMAu	rs1048757	G/C	10	100004441	0.0888615	0.149963	0.567867	FALSE
TMAu	rs3750595	C/A	10	100004906	0.100177	0.145644	0.498463	FALSE
TMAu	rs10786405	T/C	10	100005282	-0.100177	0.145644	0.498463	FALSE
TMAu	rs3793692	G/A	10	100008436	-0.0888615	0.149963	0.567867	FALSE
TMAu	rs737656	G/A	10	100012739	-0.107391	0.150475	0.491884	FALSE
TMAu	rs737657	G/A	10	100012890	-0.0888615	0.149963	0.567867	FALSE
TMAu	rs7086391	T/C	10	100013563	0.0800624	0.172171	0.642845	FALSE
TMAu	rs878177	T/C	10	100013815	-0.376847	0.141528	0.0099059	FALSE
TMAu	rs878178	T/A	10	100013977	0.0888615	0.149963	0.567867	FALSE
TMAu	rs3763688	G/C	10	100015563	-0.514319	0.200084	0.0118785	FALSE
TMAu	rs3763689	T/G	10	100015603	0.0262001	0.170086	0.878148	FALSE
TMAu	rs1983867	G/C	10	100016196	0.100177	0.145644	0.498463	FALSE
TMAu	rs1983866	T/A	10	100016313	-0.30114	0.143163	0.0403192	FALSE
TMAu	rs1983865	T/C	10	100016339	0.0446552	0.140619	0.760508	FALSE
TMAu	rs1983864	T/G	10	100017453	0.376847	0.141528	0.0099059	FALSE
TMAu	rs7077266	T/G	10	100019039	0.564216	0.205039	0.00716452	FALSE
TMAu	rs11189526	T/G	10	100020572	-0.0888615	0.149963	0.567867	FALSE
TMAu	rs735116	G/A	10	100021533	0.0888615	0.149963	0.567867	FALSE
TMAu	rs746257	G/A	10	100021983	-0.553014	0.209459	0.010663	FALSE
TMAu	rs11189527	G/C	10	100023857	0.0888615	0.149963	0.567867	FALSE
TMAu	rs11189528	T/G	10	100023957	-0.0888615	0.149963	0.567867	FALSE
TMAu	rs12778335	T/C	10	100025095	-0.0888615	0.149963	0.567867	FALSE
TMAu	rs10748723	G/A	10	100025816	0.074534	0.150158	0.633158	FALSE
TMAu	rs10736126	G/A	10	100025924	-0.100177	0.145644	0.498463	FALSE
TMAu	rs7090035	G/C	10	100026791	0.100177	0.145644	0.498463	FALSE
TMAu	rs7899882	T/C	10	100030768	-0.565903	0.170785	0.0012727	FALSE
TMAu	rs10786408	T/C	10	100031394	0.355412	0.124701	0.00728728	FALSE
TMAu	rs10883056	G/C	10	100031573	-0.485868	0.155672	0.00319211	FALSE
TMAu	rs10883057	G/C	10	100032037	0.457121	0.147323	0.0033856	FALSE
TMAu	rs878259	G/A	10	100032289	0.457121	0.147323	0.0033856	FALSE
TMAu	rs7910702	T/C	10	100034840	-0.054992	0.236135	0.816122	FALSE
TMAu	rs12784535	T/C	10	100034883	0.0854875	0.181743	0.641288	FALSE
TMAu	rs1365	C/A	10	100035666	0.0424455	0.235867	0.857317	FALSE
TMAu	rs7915743	T/C	10	100036209	0.0155976	0.215543	0.942355	FALSE
TMAu	rs2094071	G/A	10	100037683	0.0564505	0.168632	0.737926	FALSE
TMAu	rs4376831	G/A	10	100042200	-0.0424455	0.235867	0.857317	FALSE
TMAu	rs4919201	G/A	10	100044928	-0.245973	0.161614	0.130454	FALSE
TMAu	rs11599085	G/C	10	100046035	-0.356492	0.1377	0.0121458	FALSE
TMAu	rs7905091	T/G	10	100046078	-0.238503	0.212658	0.263864	FALSE
TMAu	rs1325499	G/A	10	100046679	0.257075	0.208735	0.219959	FALSE
TMAu	rs11599733	G/A	10	100047185	-0.337475	0.143859	0.0226172	FALSE
TMAu	rs10883059	T/C	10	100047501	-0.229959	0.136529	0.097898	FALSE
TMAu	rs10748724	C/A	10	100047975	0.238503	0.212658	0.263864	FALSE
TMAu	rs4919205	G/A	10	100049438	-0.277503	0.148956	0.0686071	FALSE
TMAu	rs4919206	G/C	10	100049479	0.382307	0.1275	0.00389621	FALSE
TMAu	rs927741	T/C	10	100050356	-0.175399	0.139333	0.213353	FALSE
TMAu	rs7895376	T/C	10	100050681	0.194348	0.139854	0.170156	FALSE
TMAu	rs1925637	G/A	10	100051497	0.255858	0.135573	0.0631877	FALSE
TMAu	rs11592082	T/A	10	100052464	-0.127267	0.135677	0.352063	FALSE
TMAu	rs2182166	G/A	10	100052901	-0.167698	0.145414	0.252003	FALSE
TMAu	rs6584182	T/C	10	100055644	-0.104052	0.139922	0.460539	FALSE
TMAu	rs6584183	T/C	10	100056045	0.104052	0.139922	0.460539	FALSE
TMAu	rs1925636	T/C	10	100057707	0.0828338	0.138519	0.552309	FALSE
TMAu	rs7098860	G/A	10	100058711	-0.372145	0.15579	0.0191392	FALSE
TMAu	rs17453066	T/C	10	100060652	0.0788237	0.204268	0.700836	FALSE
TMAu	rs11189541	G/A	10	100066603	0.451308	0.137804	0.00147125	FALSE
TMAu	rs751160	G/C	10	100070040	-0.451308	0.137804	0.00147125	FALSE
TMAu	rs751159	T/A	10	100070243	-0.451308	0.137804	0.00147125	FALSE
TMAu	rs17453254	C/A	10	100070557	0.451308	0.137804	0.00147125	FALSE
TMAu	rs12764214	T/C	10	100072209	-0.394645	0.140542	0.0059572	FALSE
TMAu	rs11189549	G/A	10	100073157	-0.448579	0.136655	0.00144331	FALSE
TMAu	rs1252902	C/A	10	100074095	-0.451308	0.137804	0.00147125	FALSE
TMAu	rs10883064	T/C	10	100074364	0.451308	0.137804	0.00147125	FALSE
TMAu	rs4917813	T/G	10	100074813	0.451308	0.137804	0.00147125	FALSE
TMAu	rs1252900	G/A	10	100075463	-0.457789	0.139048	0.00139478	FALSE
TMAu	rs4919207	G/A	10	100076354	-0.451308	0.137804	0.00147125	FALSE
TMAu	rs1252898	T/C	10	100076785	0.451308	0.137804	0.00147125	FALSE
TMAu	rs10748725	G/A	10	100076982	0.459464	0.148552	0.0027862	FALSE
TMAu	rs11189550	T/C	10	100077085	0.462847	0.323122	0.156543	FALSE
TMAu	rs11189551	T/C	10	100077152	0.462847	0.323122	0.156543	FALSE
TMAu	rs1252897	G/A	10	100077338	0.42349	0.137419	0.00266599	FALSE
TMAu	rs927739	T/C	10	100077732	0.42349	0.137419	0.00266599	FALSE
TMAu	rs1252895	T/C	10	100079947	-0.567034	0.138253	9.425e-05	FALSE
TMAu	rs11599019	G/A	10	100080631	0.529715	0.141737	0.000363367	FALSE
TMAu	rs942800	C/A	10	100081443	-0.235794	0.151881	0.129073	FALSE
TMAu	rs2862297	C/A	10	100081757	-0.212671	0.146597	0.157372	FALSE
TMAu	rs7076493	C/A	10	100082385	-0.154258	0.231441	0.505705	FALSE
TMAu	rs10786410	G/A	10	100082534	0.0363727	0.152599	0.813082	FALSE
TMAu	rs4917815	T/C	10	100082956	0.154258	0.231441	0.505705	FALSE
TMAu	rs11189552	T/G	10	100083404	0.252031	0.139022	0.0777098	FALSE
TMAu	rs1252890	T/G	10	100083643	-0.00787357	0.17007	0.963766	FALSE
TMAu	rs11189553	G/A	10	100084117	0.154258	0.231441	0.505705	FALSE
TMAu	rs4917817	C/A	10	100085888	0.0769046	0.152883	0.617664	FALSE
TMAu	rs4919209	T/G	10	100086341	-0.126709	0.170323	0.465439	FALSE
TMAu	rs6584185	T/C	10	100087228	-0.0965038	0.1719	0.582743	FALSE
TMAu	rs4919210	T/C	10	100088262	-0.154258	0.231441	0.505705	FALSE
TMAu	rs7075856	C/A	10	100089210	-0.0105857	0.19088	0.95701	FALSE
TMAu	rs7904756	G/A	10	100089728	-0.154258	0.231441	0.505705	FALSE
TMAu	rs10883067	T/A	10	100090116	0.0105857	0.19088	0.95701	FALSE
TMAu	rs4919211	G/A	10	100090210	-0.0389274	0.168801	0.820145	FALSE
TMAu	rs7097807	G/A	10	100091582	0.00787357	0.17007	0.963766	FALSE
TMAu	rs4917818	G/A	10	100092168	-0.0389274	0.168801	0.820145	FALSE
TMAu	rs11189555	G/A	10	100092279	-0.0660943	0.148523	0.657238	FALSE
TMAu	rs4919213	C/A	10	100093928	-0.154258	0.231441	0.505705	FALSE
TMAu	rs1000280	G/A	10	100096148	-0.0167403	0.15016	0.913015	FALSE
TMAu	rs1536154	C/A	10	100096859	-0.0607596	0.145084	0.675886	FALSE
TMAu	rs1536153	T/A	10	100096980	0.0393225	0.14683	0.789468	FALSE
TMAu	rs7901537	T/C	10	100097469	0.0607596	0.145084	0.675886	FALSE
TMAu	rs10883071	G/A	10	100097882	0.0393225	0.14683	0.789468	FALSE
TMAu	rs746033	T/G	10	100098716	0.0259652	0.156594	0.868752	FALSE
TMAu	rs4917819	C/A	10	100099508	-0.0393225	0.14683	0.789468	FALSE
TMAu	rs17109450	T/G	10	100099651	-0.154258	0.231441	0.505705	FALSE
TMAu	rs10883072	G/A	10	100100197	-0.299094	0.157199	0.0609999	FALSE
TMAu	rs11189557	T/A	10	100100450	0.0345444	0.192591	0.861226	FALSE
TMAu	rs10748726	G/A	10	100100503	0.155386	0.165931	0.356099	FALSE
TMAu	rs2147892	G/C	10	100100772	0.0613626	0.154613	0.693022	FALSE
TMAu	rs753299	T/C	10	100101261	0.101668	0.183218	0.589102	FALSE
TMAu	rs750298	G/A	10	100102034	-0.399032	0.133319	0.00357784	FALSE
TMAu	rs11189558	G/A	10	100102403	-0.105488	0.152665	0.490733	FALSE
TMAu	rs11189559	G/A	10	100102771	-0.25658	0.162027	0.118876	FALSE
TMAu	rs11189563	G/A	10	100104006	-0.187871	0.149721	0.215497	FALSE
TMAu	rs7081279	T/C	10	100104314	-0.33868	0.143412	0.0209864	FALSE
TMAu	rs4919218	T/C	10	100111392	-0.146016	0.1369	0.289802	FALSE
TMAu	rs4917823	C/A	10	100111749	-0.146016	0.1369	0.289802	FALSE
TMAu	rs4919220	G/A	10	100114954	0.424082	0.14844	0.00543048	FALSE
TMAu	rs765456	G/A	10	100114965	0.424082	0.14844	0.00543048	FALSE
TMAu	rs4919221	T/C	10	100115027	-0.424082	0.14844	0.00543048	FALSE
TMAu	rs11189569	T/C	10	100116197	0.686686	0.24221	0.00583663	FALSE
TMAu	rs4568939	T/A	10	100116611	0.494932	0.137308	0.000584574	FALSE
TMAu	rs4917828	T/C	10	100116726	0.515208	0.150316	0.00112161	FALSE
TMAu	rs4491153	G/A	10	100117054	0.420699	0.144413	0.00465747	FALSE
TMAu	rs11189572	T/C	10	100118265	-0.686686	0.24221	0.00583663	FALSE
TMAu	rs11189574	G/A	10	100118596	-0.396251	0.163103	0.0172495	FALSE
TMAu	rs11189577	C/A	10	100119093	-0.686686	0.24221	0.00583663	FALSE
TMAu	rs10883081	T/G	10	100120346	-0.498464	0.138796	0.000525151	FALSE
TMAu	rs7894393	T/C	10	100120872	0.332491	0.198837	0.0993631	FALSE
TMAu	rs11814584	T/C	10	100123612	0.59232	0.239133	0.0154876	FALSE
TMAu	rs6584190	T/C	10	100124075	0.725324	0.220087	0.00146245	FALSE
TMAu	rs17109506	T/C	10	100126386	-0.59232	0.239133	0.0154876	FALSE
TMAu	rs17109550	C/A	10	100133931	0.802992	0.230682	0.000832824	FALSE
TMAu	rs7096654	T/C	10	100134036	0.997089	0.106105	1.12142e-14	TRUE
TMAu	rs17109581	T/A	10	100140636	-0.817797	0.281993	0.00474205	FALSE
TMAu	rs7075655	G/A	10	100142068	-0.706524	0.121758	8.76379e-08	FALSE
TMAu	rs17109597	G/A	10	100142154	0.804995	0.127022	8.70971e-09	FALSE
TMAu	rs2296441	T/C	10	100144782	-0.747066	0.119082	1.4331e-08	FALSE
TMAu	rs2296439	G/C	10	100146771	-0.95571	0.23772	0.000133386	FALSE
TMAu	rs2296438	T/C	10	100146895	1.05142	0.0869333	1.21817e-20	TRUE
TMAu	rs4345897	G/A	10	100147060	-1.05142	0.0869333	1.21817e-20	TRUE
TMAu	rs4400721	G/A	10	100147097	0.822792	0.118108	5.72477e-10	FALSE
TMAu	rs2147897	T/G	10	100147813	-1.05142	0.0869333	1.21817e-20	TRUE
TMAu	rs4539242	T/C	10	100148058	1.10347	0.080839	2.8225e-23	TRUE
TMAu	rs2147896	G/A	10	100148176	-1.10347	0.080839	2.8225e-23	TRUE
TMAu	rs2182168	G/C	10	100148353	-1.05142	0.0869333	1.21817e-20	TRUE
TMAu	rs2274249	T/C	10	100148415	-0.818594	0.217817	0.00032632	FALSE
TMAu	rs2274248	T/C	10	100148542	-0.822343	0.125207	3.26072e-09	FALSE
TMAu	rs755126	G/A	10	100148951	1.05142	0.0869333	1.21817e-20	TRUE
TMAu	rs2274247	G/C	10	100150148	1.05142	0.0869333	1.21817e-20	TRUE
TMAu	rs17109620	G/A	10	100150938	0.95571	0.23772	0.000133386	FALSE
TMAu	rs10883084	T/C	10	100151189	1.05142	0.0869333	1.21817e-20	TRUE
TMAu	rs10786415	G/A	10	100151266	-1.09038	0.0837027	3.9381e-22	TRUE
TMAu	rs942814	G/A	10	100151305	-1.10347	0.080839	2.8225e-23	TRUE
TMAu	rs7097824	T/A	10	100151799	-1.05142	0.0869333	1.21817e-20	TRUE
TMAu	rs7082192	T/C	10	100151844	1.05142	0.0869333	1.21817e-20	TRUE
TMAu	rs6584192	T/G	10	100152373	1.05142	0.0869333	1.21817e-20	TRUE
TMAu	rs11189586	G/A	10	100154096	-1.01849	0.0963404	2.50399e-17	TRUE
TMAu	rs11597425	T/G	10	100154202	-1.04386	0.0930456	8.02731e-19	TRUE
TMAu	rs11597428	G/C	10	100154247	1.04386	0.0930456	8.02731e-19	TRUE
TMAu	rs11189590	T/G	10	100154605	1.04386	0.0930456	8.02731e-19	TRUE
TMAu	rs10883085	T/A	10	100155613	-1.04386	0.0930456	8.02731e-19	TRUE
TMAu	rs11189592	C/A	10	100155642	0.822343	0.125207	3.26072e-09	FALSE
TMAu	rs17109634	T/C	10	100155793	-0.95571	0.23772	0.000133386	FALSE
TMAu	rs7907555	T/C	10	100155810	-1.04386	0.0930456	8.02731e-19	TRUE
TMAu	rs6584193	T/C	10	100155898	0.684177	0.14455	9.43021e-06	FALSE
TMAu	rs7924209	T/C	10	100155927	1.04386	0.0930456	8.02731e-19	TRUE
TMAu	rs7924303	T/C	10	100155963	1.04386	0.0930456	8.02731e-19	TRUE
TMAu	rs7908310	G/A	10	100156227	1.04386	0.0930456	8.02731e-19	TRUE
TMAu	rs7072216	T/C	10	100156853	1.10347	0.080839	2.8225e-23	TRUE
TMAu	rs10883087	T/A	10	100156990	1.04386	0.0930456	8.02731e-19	TRUE
TMAu	rs10786418	T/C	10	100157368	-1.04386	0.0930456	8.02731e-19	TRUE
TMAu	rs4551689	T/C	10	100157593	1.04386	0.0930456	8.02731e-19	TRUE
TMAu	rs4488133	T/A	10	100159136	-1.10347	0.080839	2.8225e-23	TRUE
TMAu	rs17109650	T/C	10	100159373	0.845292	0.235371	0.000575807	FALSE
TMAu	rs6584194	T/C	10	100160399	1.05723	0.0830491	4.2069e-21	TRUE
TMAu	rs17109653	T/C	10	100162151	0.796258	0.21929	0.000540729	FALSE
TMAu	rs17109657	G/C	10	100162695	0.796258	0.21929	0.000540729	FALSE
TMAu	rs10883089	C/A	10	100163120	-0.859086	0.134652	9.29588e-09	FALSE
TMAu	rs7897357	T/C	10	100163597	-1.02104	0.102109	5.65682e-16	TRUE
TMAu	rs7914401	T/C	10	100163928	0.880526	0.138237	8.78054e-09	FALSE
TMAu	rs733345	T/G	10	100164215	-0.880526	0.138237	8.78054e-09	FALSE
TMAu	rs4474372	T/C	10	100164571	-0.880526	0.138237	8.78054e-09	FALSE
TMAu	rs4475861	T/C	10	100164989	-0.880526	0.138237	8.78054e-09	FALSE
TMAu	rs2147901	C/A	10	100165496	0.880526	0.138237	8.78054e-09	FALSE
TMAu	rs17109662	C/A	10	100165967	0.805885	0.230422	0.000833762	FALSE
TMAu	rs17455577	T/C	10	100165997	0.487135	0.151948	0.00175819	FALSE
TMAu	rs7910973	G/A	10	100166732	0.880526	0.138237	8.78054e-09	FALSE
TMAu	rs7911036	T/A	10	100167015	-0.880526	0.138237	8.78054e-09	FALSE
TMAu	rs10883092	C/A	10	100167276	-0.874855	0.139966	1.53218e-08	FALSE
TMAu	rs12763326	G/A	10	100167396	0.880526	0.138237	8.78054e-09	FALSE
TMAu	rs12763379	G/A	10	100167466	0.880526	0.138237	8.78054e-09	FALSE
TMAu	rs942810	G/C	10	100167860	1.02104	0.102109	5.65682e-16	TRUE
TMAu	rs17109675	T/C	10	100167951	0.805885	0.230422	0.000833762	FALSE
TMAu	rs942809	G/A	10	100168001	0.880526	0.138237	8.78054e-09	FALSE
TMAu	rs942808	C/A	10	100168102	0.880526	0.138237	8.78054e-09	FALSE
TMAu	rs942807	G/A	10	100168219	0.880526	0.138237	8.78054e-09	FALSE
TMAu	rs942806	G/A	10	100168248	0.880526	0.138237	8.78054e-09	FALSE
TMAu	rs942805	G/A	10	100168372	0.880526	0.138237	8.78054e-09	FALSE
TMAu	rs942804	C/A	10	100168499	0.880526	0.138237	8.78054e-09	FALSE
TMAu	rs942803	T/G	10	100168631	-0.880526	0.138237	8.78054e-09	FALSE
TMAu	rs9787550	T/C	10	100169051	-0.880526	0.138237	8.78054e-09	FALSE
TMAu	rs7923729	T/C	10	100169465	-0.880526	0.138237	8.78054e-09	FALSE
TMAu	rs9804285	T/C	10	100169472	-0.880526	0.138237	8.78054e-09	FALSE
TMAu	rs6584200	G/A	10	100170037	-0.880526	0.138237	8.78054e-09	FALSE
TMAu	rs6584202	G/A	10	100170383	0.880526	0.138237	8.78054e-09	FALSE
TMAu	rs7896828	T/A	10	100170507	-1.02104	0.102109	5.65682e-16	TRUE
TMAu	rs3814140	T/C	10	100170762	-0.880526	0.138237	8.78054e-09	FALSE
TMAu	rs3814141	G/A	10	100171028	0.855812	0.143112	4.61955e-08	FALSE
TMAu	rs3814142	G/C	10	100171104	-0.880526	0.138237	8.78054e-09	FALSE
TMAu	rs10748729	G/C	10	100171371	0.880526	0.138237	8.78054e-09	FALSE
TMAu	rs7909131	G/A	10	100171471	-1.02104	0.102109	5.65682e-16	TRUE
TMAu	rs7910247	T/C	10	100172252	-0.880526	0.138237	8.78054e-09	FALSE
TMAu	rs6584204	G/C	10	100173580	-0.880526	0.138237	8.78054e-09	FALSE
TMAu	rs3750601	C/A	10	100174561	0.880526	0.138237	8.78054e-09	FALSE
TMAu	rs2147900	T/C	10	100174721	0.880526	0.138237	8.78054e-09	FALSE
TMAu	rs2274244	G/A	10	100175218	-0.880526	0.138237	8.78054e-09	FALSE
TMAu	rs2274243	T/C	10	100175267	0.880526	0.138237	8.78054e-09	FALSE
TMAu	rs8181292	G/A	10	100175477	-0.880526	0.138237	8.78054e-09	FALSE
TMAu	rs3750604	G/A	10	100175581	0.855812	0.143112	4.61955e-08	FALSE
TMAu	rs3750605	T/C	10	100175654	-0.855812	0.143112	4.61955e-08	FALSE
TMAu	rs1061437	T/C	10	100176154	-0.880526	0.138237	8.78054e-09	FALSE
TMAu	rs1739	G/A	10	100176339	-1.02104	0.102109	5.65682e-16	TRUE
TMAu	rs3830020	G/C	10	100176615	1.02104	0.102109	5.65682e-16	TRUE
TMAu	rs3830019	T/C	10	100176848	-0.95571	0.23772	0.000133386	FALSE
TMAu	rs701801	T/C	10	100176869	-1.01154	0.10893	1.50873e-14	TRUE
TMAu	rs1061115	G/A	10	100177049	1.02104	0.102109	5.65682e-16	TRUE
TMAu	rs11189600	T/C	10	100179274	-0.998831	0.108862	4.52935e-14	TRUE
TMAu	rs2296436	T/C	10	100179851	0.814168	0.216843	0.000339525	FALSE
TMAu	rs17109834	T/C	10	100181847	0.814168	0.216843	0.000339525	FALSE
TMAu	rs2296435	T/C	10	100182285	0.855812	0.143112	4.61955e-08	FALSE
TMAu	rs2296434	G/C	10	100183570	0.814168	0.216843	0.000339525	FALSE
TMAu	rs7921146	G/A	10	100186601	0.855812	0.143112	4.61955e-08	FALSE
TMAu	rs10883094	G/A	10	100188106	0.735231	0.146918	3.11479e-06	FALSE
TMAu	rs12242431	G/C	10	100189076	0.467321	0.223995	0.0395859	FALSE
TMAu	rs1061135	G/A	10	100189138	-0.181334	0.1399	0.227161	FALSE
TMAu	rs1061134	G/A	10	100189252	0.494544	0.219923	0.0268655	FALSE
TMAu	rs11592273	C/A	10	100189568	-0.279101	0.256401	0.283853	FALSE
TMAu	rs2296431	T/C	10	100190264	-0.248639	0.137615	0.0875002	FALSE
TMAu	rs1801287	G/A	10	100190920	0.0636134	0.145618	0.677288	FALSE
TMAu	rs11189602	G/C	10	100191495	0.490109	0.16197	0.00328951	FALSE
TMAu	rs11599112	T/C	10	100191876	0.366069	0.169694	0.0336917	FALSE
TMAu	rs11599208	T/C	10	100192372	0.393263	0.170934	0.0239385	FALSE
TMAu	rs11595763	C/A	10	100193526	0.393263	0.170934	0.0239385	FALSE
TMAu	rs1886728	G/C	10	100193679	-0.219144	0.139303	0.136711	FALSE
TMAu	rs11591594	T/C	10	100193883	0.371969	0.179744	0.0415257	FALSE
TMAu	rs17535384	G/A	10	100194602	0.393263	0.170934	0.0239385	FALSE
TMAu	rs11594426	T/C	10	100194829	-0.393263	0.170934	0.0239385	FALSE
TMAu	rs11594443	T/C	10	100194909	-0.366069	0.169694	0.0336917	FALSE
TMAu	rs11539873	G/A	10	100195130	0.83569	0.270249	0.00274108	FALSE
TMAu	rs2296430	T/A	10	100195583	-0.349117	0.155249	0.0269203	FALSE
TMAu	rs7082038	C/A	10	100195886	0.393263	0.170934	0.0239385	FALSE
TMAu	rs7100143	T/C	10	100195973	-0.393263	0.170934	0.0239385	FALSE
TMAu	rs7082570	G/A	10	100195996	-0.393263	0.170934	0.0239385	FALSE
TMAu	rs11597139	T/A	10	100196020	0.393263	0.170934	0.0239385	FALSE
TMAu	rs11599696	C/A	10	100200064	0.393263	0.170934	0.0239385	FALSE
TMAu	rs11599712	G/A	10	100200149	0.393263	0.170934	0.0239385	FALSE
TMAu	rs7071947	G/A	10	100200797	0.219144	0.139303	0.136711	FALSE
TMAu	rs7909297	G/A	10	100201707	0.393263	0.170934	0.0239385	FALSE
TMAu	rs12249733	G/A	10	100203437	0.248382	0.273539	0.371272	FALSE
TMAu	rs10786422	T/C	10	100204727	-0.0636134	0.145618	0.677288	FALSE
TMAu	rs7075080	G/A	10	100212374	-0.0792886	0.137488	0.585008	FALSE
TMAu	rs10786423	T/C	10	100212671	-0.1053	0.287846	0.715067	FALSE
TMAu	rs4611142	G/A	10	100216781	0.0114087	0.141917	0.937386	FALSE
TMAu	rs4919228	G/A	10	100217572	0.0114087	0.141917	0.937386	FALSE
TMAu	rs4917831	T/C	10	100217692	0.238632	0.144321	0.111835	FALSE
TMAu	rs4917833	T/C	10	100217808	-0.244059	0.135129	0.0858378	FALSE
TMAu	rs4917834	G/A	10	100217879	0.222164	0.142153	0.13887	FALSE
TMAu	rs4917835	T/C	10	100217972	-0.222164	0.142153	0.13887	FALSE
TMAu	rs4917836	C/A	10	100218059	0.00725114	0.145776	0.961522	FALSE
TMAu	rs10883098	G/C	10	100218195	-0.222164	0.142153	0.13887	FALSE
TMAu	rs10786427	G/A	10	100218382	0.222164	0.142153	0.13887	FALSE
TMAu	rs1060447	T/C	10	100218532	-0.222164	0.142153	0.13887	FALSE
TMAu	rs1060446	G/C	10	100218721	-0.222164	0.142153	0.13887	FALSE
TMAu	rs3179357	G/A	10	100218732	-0.222164	0.142153	0.13887	FALSE
TMAu	rs1060445	T/C	10	100218766	-0.222164	0.142153	0.13887	FALSE
TMAu	rs17457493	T/G	10	100218895	-0.891257	0.266852	0.0012859	FALSE
TMAu	rs10883099	G/A	10	100219314	0.222164	0.142153	0.13887	FALSE
TMAu	rs10883100	T/A	10	100219374	0.222164	0.142153	0.13887	FALSE
TMAu	rs11189618	G/A	10	100219519	0.222164	0.142153	0.13887	FALSE
TMAu	rs11189619	T/C	10	100220012	-0.222164	0.142153	0.13887	FALSE
TMAu	rs1925645	T/C	10	100220472	0.222164	0.142153	0.13887	FALSE
TMAu	rs1925644	T/C	10	100220488	-0.222164	0.142153	0.13887	FALSE
TMAu	rs17457603	T/A	10	100220928	0.276032	0.169273	0.105811	FALSE
TMAu	rs754585	T/C	10	100224342	-0.244059	0.135129	0.0858378	FALSE
TMAu	rs754586	T/C	10	100224362	0.0489706	0.131504	0.715117	FALSE
TMAu	rs7922362	T/C	10	100225502	0.0114087	0.141917	0.937386	FALSE
TMAu	rs6584206	T/C	10	100225657	0.0114087	0.141917	0.937386	FALSE
TMAu	rs1998757	G/C	10	100229506	0.116598	0.167761	0.48891	FALSE
TMAu	rs1998756	T/C	10	100229532	0.000534393	0.141879	0.997	FALSE
TMAu	rs1998755	T/C	10	100229765	0.0406646	0.147678	0.784829	FALSE
TMAu	rs6584209	T/C	10	100230982	-0.000534393	0.141879	0.997	FALSE
TMAu	rs11189627	T/G	10	100234276	-0.000534393	0.141879	0.997	FALSE
TMAu	rs7070118	T/C	10	100235520	-0.0118132	0.142709	0.934525	FALSE
TMAu	rs12265225	T/C	10	100236682	0.0118132	0.142709	0.934525	FALSE
TMAu	rs17458332	T/C	10	100240246	-0.120411	0.219138	0.584969	FALSE
TMAu	rs17458353	G/A	10	100240305	0.037995	0.190717	0.843995	FALSE
TMAu	rs10883108	G/A	10	100240334	0.116598	0.167761	0.48891	FALSE
TMAu	rs11189628	T/C	10	100240681	0.0375697	0.157324	0.814506	FALSE
TMAu	rs10748732	T/C	10	100242039	-0.0591051	0.255521	0.817645	FALSE
TMAu	rs11189629	T/C	10	100242195	0.361009	0.26774	0.181037	FALSE
TMAu	rs2764820	T/C	10	100243279	0.293244	0.249828	0.246733	FALSE
TMAu	rs12572945	G/A	10	100245092	-0.189944	0.158264	0.231495	FALSE
TMAu	rs4919231	G/A	10	100247590	0.123261	0.155539	0.428767	FALSE
TMAu	rs4442477	T/C	10	100249295	0.0566723	0.136838	0.680717	FALSE
TMAu	rs1925647	C/A	10	100250186	0.309174	0.170802	0.07221	FALSE
TMAu	rs10748733	T/C	10	100251388	-0.455376	0.255515	0.0788491	FALSE
TMAu	rs2017304	G/A	10	100251968	-0.0102983	0.139895	0.941451	FALSE
TMAu	rs11189634	C/A	10	100252658	-0.0102983	0.139895	0.941451	FALSE
TMAu	rs10883109	T/G	10	100257360	-0.293244	0.249828	0.246733	FALSE
TMAu	rs12779386	G/A	10	100263093	0.211586	0.158131	0.182512	FALSE
TMAu	rs10160114	T/C	10	100264844	0.293244	0.249828	0.246733	FALSE
TMAu	rs1932793	G/A	10	100267283	-0.293244	0.249828	0.246733	FALSE
TMAu	rs10786430	C/A	10	100267867	0.293244	0.249828	0.246733	FALSE
TMAu	rs1889974	G/A	10	100268520	-0.0510096	0.138028	0.711897	FALSE
TMAu	rs10883111	T/C	10	100272975	0.0668735	0.135739	0.622681	FALSE
TMAu	rs10883112	C/A	10	100273119	-0.104722	0.138231	0.449472	FALSE
TMAu	rs10786432	G/A	10	100273679	-0.164185	0.150138	0.276024	FALSE
TMAu	rs10883113	G/A	10	100273760	-0.0824033	0.135399	0.543053	FALSE
TMAu	rs11189646	T/C	10	100274999	0.164185	0.150138	0.276024	FALSE
TMAu	rs716838	T/C	10	100275412	-0.104722	0.138231	0.449472	FALSE
TMAu	rs10786434	C/A	10	100276039	0.166909	0.245753	0.50095	FALSE
TMAu	rs2169462	T/C	10	100277181	-0.166909	0.245753	0.50095	FALSE
TMAu	rs7919903	T/C	10	100277652	-0.166909	0.245753	0.50095	FALSE
TMAu	rs10748736	T/C	10	100277799	0.166909	0.245753	0.50095	FALSE
TMAu	rs10509722	T/C	10	100278017	0.166909	0.245753	0.50095	FALSE
TMAu	rs10883115	T/C	10	100278092	-0.166909	0.245753	0.50095	FALSE
TMAu	rs10736133	G/A	10	100278466	-0.166909	0.245753	0.50095	FALSE
TMAu	rs10509723	T/C	10	100278623	0.166909	0.245753	0.50095	FALSE
TMAu	rs4917837	G/A	10	100278857	0.166909	0.245753	0.50095	FALSE
TMAu	rs4919232	G/A	10	100278991	0.166909	0.245753	0.50095	FALSE
TMAu	rs4917838	T/C	10	100279323	-0.166909	0.245753	0.50095	FALSE
TMAu	rs1999789	G/C	10	100279998	-0.166909	0.245753	0.50095	FALSE
TMAu	rs7912749	T/C	10	100280107	0.164185	0.150138	0.276024	FALSE
TMAu	rs11594030	G/A	10	100280492	-0.159716	0.150595	0.29054	FALSE
TMAu	rs4919233	T/G	10	100283151	-0.164185	0.150138	0.276024	FALSE
TMAu	rs7923631	T/C	10	100284148	-0.164185	0.150138	0.276024	FALSE
TMAu	rs4919234	T/G	10	100286047	0.164185	0.150138	0.276024	FALSE
TMAu	rs4919235	G/C	10	100286138	0.164185	0.150138	0.276024	FALSE
TMAu	rs542386	C/A	10	100286160	0.250157	0.26177	0.355388	FALSE
TMAu	rs563823	G/A	10	100287607	-0.0342678	0.264258	0.896915	FALSE
TMAu	rs560228	T/C	10	100287958	0.0861741	0.25664	0.737447	FALSE
TMAu	rs557326	T/C	10	100288305	0.0861741	0.25664	0.737447	FALSE
TMAu	rs534666	G/A	10	100288452	-0.0342678	0.264258	0.896915	FALSE
TMAu	rs616979	G/A	10	100289101	-0.234393	0.270745	0.403404	FALSE
TMAu	rs11189651	T/G	10	100289199	-0.265151	0.151897	0.0837841	FALSE
TMAu	rs12358472	C/A	10	100290770	-0.265151	0.151897	0.0837841	FALSE
TMAu	rs577969	T/C	10	100291176	-0.234393	0.270745	0.403404	FALSE
TMAu	rs1462134	G/C	10	100291583	0.128972	0.136482	0.346808	FALSE
TMAu	rs682247	T/C	10	100291718	-0.0861741	0.25664	0.737447	FALSE
TMAu	rs680488	C/A	10	100292080	0.234393	0.270745	0.403404	FALSE
TMAu	rs922324	C/A	10	100292627	0.0803633	0.139581	0.566142	FALSE
TMAu	rs11189652	G/A	10	100292977	0.128972	0.136482	0.346808	FALSE
TMAu	rs4917840	T/A	10	100293029	-0.265151	0.151897	0.0837841	FALSE
TMAu	rs665142	T/C	10	100293182	0.0861741	0.25664	0.737447	FALSE
TMAu	rs898892	T/G	10	100293700	-0.265151	0.151897	0.0837841	FALSE
TMAu	rs10883118	G/A	10	100293897	-0.265151	0.151897	0.0837841	FALSE
TMAu	rs1809320	G/A	10	100294255	-0.265151	0.151897	0.0837841	FALSE
TMAu	rs573677	G/A	10	100294517	0.234393	0.270745	0.403404	FALSE
TMAu	rs567137	T/C	10	100295225	-0.0861741	0.25664	0.737447	FALSE
TMAu	rs542431	T/C	10	100295624	-0.0861741	0.25664	0.737447	FALSE
TMAu	rs536221	T/C	10	100296252	-0.234393	0.270745	0.403404	FALSE
TMAu	rs10748737	T/C	10	100299587	-0.0861741	0.25664	0.737447	FALSE
TMAu	rs10786436	T/C	10	100300182	0.168541	0.142244	0.240308	FALSE
TMAu	rs11189671	T/A	10	100307715	0.195911	0.133345	0.144392	FALSE
TMAu	rs12355571	T/C	10	100308507	-0.128972	0.136482	0.346808	FALSE
TMAu	rs584705	G/A	10	100308644	0.0861741	0.25664	0.737447	FALSE
TMAu	rs584744	G/A	10	100308667	-0.0861741	0.25664	0.737447	FALSE
TMAu	rs508451	T/C	10	100310412	0.191289	0.207527	0.364968	FALSE
TMAu	rs621644	G/A	10	100311667	-0.179581	0.140548	0.205905	FALSE
TMAu	rs2018085	G/C	10	100313042	0.172769	0.134504	0.201786	FALSE
TMAu	rs650527	T/C	10	100313563	0.218109	0.14058	0.12537	FALSE
TMAu	rs490590	T/C	10	100313810	-0.0861741	0.25664	0.737447	FALSE
TMAu	rs486792	T/C	10	100314216	0.234393	0.270745	0.403404	FALSE
TMAu	rs7907389	G/A	10	100314339	-0.323795	0.149973	0.0333699	FALSE
TMAu	rs666243	G/A	10	100314818	-0.0861741	0.25664	0.737447	FALSE
TMAu	rs10509724	T/C	10	100315552	-0.0861741	0.25664	0.737447	FALSE
TMAu	rs540477	T/C	10	100315775	-0.234393	0.270745	0.403404	FALSE
TMAu	rs539559	T/C	10	100315885	0.0861741	0.25664	0.737447	FALSE
TMAu	rs513809	T/A	10	100316404	-0.0861741	0.25664	0.737447	FALSE
TMAu	rs7097086	G/A	10	100317043	-0.218109	0.14058	0.12537	FALSE
TMAu	rs10883130	T/C	10	100318067	-0.147643	0.136073	0.280361	FALSE
TMAu	rs541519	G/A	10	100318436	0.0861741	0.25664	0.737447	FALSE
TMAu	rs543093	G/A	10	100318556	-0.234393	0.270745	0.403404	FALSE
TMAu	rs10748739	T/C	10	100318693	0.323795	0.149973	0.0333699	FALSE
TMAu	rs489611	T/C	10	100318793	-0.218109	0.14058	0.12537	FALSE
TMAu	rs17538604	T/C	10	100319919	-0.0861741	0.25664	0.737447	FALSE
TMAu	rs660426	T/C	10	100320131	0.0861741	0.25664	0.737447	FALSE
TMAu	rs11189677	G/C	10	100320226	-0.172769	0.134504	0.201786	FALSE
TMAu	rs10883131	G/C	10	100320500	-0.172769	0.134504	0.201786	FALSE
TMAu	rs471563	T/C	10	100321965	-0.0861741	0.25664	0.737447	FALSE
TMAu	rs472459	T/C	10	100322061	-0.0861741	0.25664	0.737447	FALSE
TMAu	rs477950	T/C	10	100322658	-0.0345549	0.231638	0.881508	FALSE
TMAu	rs500329	G/A	10	100322787	-0.234393	0.270745	0.403404	FALSE
TMAu	rs501282	T/C	10	100322901	0.0861741	0.25664	0.737447	FALSE
TMAu	rs598076	G/A	10	100323387	0.0861741	0.25664	0.737447	FALSE
TMAu	rs505981	T/C	10	100323444	0.0861741	0.25664	0.737447	FALSE
TMAu	rs610884	T/C	10	100323941	0.0861741	0.25664	0.737447	FALSE
TMAu	rs11815889	C/A	10	100324001	-0.323795	0.149973	0.0333699	FALSE
TMAu	rs611806	T/G	10	100324151	0.0861741	0.25664	0.737447	FALSE
TMAu	rs535182	T/C	10	100324333	-0.0861741	0.25664	0.737447	FALSE
TMAu	rs535927	T/C	10	100324376	0.0861741	0.25664	0.737447	FALSE
TMAu	rs536955	T/C	10	100324506	0.0861741	0.25664	0.737447	FALSE
TMAu	rs537790	G/A	10	100324561	-0.0861741	0.25664	0.737447	FALSE
TMAu	rs537851	T/C	10	100324581	-0.0861741	0.25664	0.737447	FALSE
TMAu	rs538873	G/A	10	100324734	0.0861741	0.25664	0.737447	FALSE
TMAu	rs538876	T/C	10	100324739	-0.0861741	0.25664	0.737447	FALSE
TMAu	rs614927	G/A	10	100324856	-0.0861741	0.25664	0.737447	FALSE
TMAu	rs628037	T/C	10	100325515	-0.234393	0.270745	0.403404	FALSE
TMAu	rs552644	T/G	10	100325645	-0.0861741	0.25664	0.737447	FALSE
TMAu	rs629789	T/C	10	100325885	0.0861741	0.25664	0.737447	FALSE
TMAu	rs10883134	G/A	10	100326006	-0.172769	0.134504	0.201786	FALSE
TMAu	rs544176	T/C	10	100326593	0.0861741	0.25664	0.737447	FALSE
TMAu	rs522425	T/C	10	100326616	-0.0861741	0.25664	0.737447	FALSE
TMAu	rs10883135	T/G	10	100326668	0.323795	0.149973	0.0333699	FALSE
TMAu	rs521390	T/A	10	100326753	-0.0861741	0.25664	0.737447	FALSE
TMAu	rs520329	T/C	10	100326904	0.0861741	0.25664	0.737447	FALSE
TMAu	rs519482	G/A	10	100326970	0.0861741	0.25664	0.737447	FALSE
TMAu	rs657442	C/A	10	100327425	0.0861741	0.25664	0.737447	FALSE
TMAu	rs658346	T/C	10	100327651	0.0861741	0.25664	0.737447	FALSE
TMAu	rs568622	G/A	10	100327667	0.0861741	0.25664	0.737447	FALSE
TMAu	rs669987	T/C	10	100327996	-0.0861741	0.25664	0.737447	FALSE
TMAu	rs563937	G/A	10	100328205	0.0861741	0.25664	0.737447	FALSE
TMAu	rs671210	T/C	10	100328257	-0.218654	0.250603	0.393253	FALSE
TMAu	rs671244	G/A	10	100328288	-0.0861741	0.25664	0.737447	FALSE
TMAu	rs10786442	G/A	10	100329154	0.0861741	0.25664	0.737447	FALSE
TMAu	rs531002	T/C	10	100329481	0.0861741	0.25664	0.737447	FALSE
TMAu	rs504600	G/C	10	100330042	0.0861741	0.25664	0.737447	FALSE
TMAu	rs609234	G/A	10	100330169	0.0861741	0.25664	0.737447	FALSE
TMAu	rs610498	G/A	10	100330451	-0.253749	0.139308	0.0728126	FALSE
TMAu	rs10748743	T/A	10	100330502	0.323795	0.149973	0.0333699	FALSE
TMAu	rs500088	T/C	10	100330515	0.0861741	0.25664	0.737447	FALSE
TMAu	rs500028	G/C	10	100330535	0.0861741	0.25664	0.737447	FALSE
TMAu	rs472241	T/A	10	100331241	-0.0861741	0.25664	0.737447	FALSE
TMAu	rs625777	C/A	10	100331520	0.0861741	0.25664	0.737447	FALSE
TMAu	rs552436	G/C	10	100332256	0.0861741	0.25664	0.737447	FALSE
TMAu	rs551674	T/C	10	100332296	0.0861741	0.25664	0.737447	FALSE
TMAu	rs549654	G/A	10	100332552	0.0861741	0.25664	0.737447	FALSE
TMAu	rs527822	G/C	10	100332616	-0.0861741	0.25664	0.737447	FALSE
TMAu	rs526877	G/C	10	100332713	0.0861741	0.25664	0.737447	FALSE
TMAu	rs526698	T/C	10	100332775	0.0861741	0.25664	0.737447	FALSE
TMAu	rs1381549	T/G	10	100332801	-0.234393	0.270745	0.403404	FALSE
TMAu	rs523205	T/A	10	100333100	-0.0861741	0.25664	0.737447	FALSE
TMAu	rs522067	G/A	10	100333290	0.0861741	0.25664	0.737447	FALSE
TMAu	rs2485029	T/G	10	100333825	-0.0861741	0.25664	0.737447	FALSE
TMAu	rs605591	G/A	10	100334239	-0.0861741	0.25664	0.737447	FALSE
TMAu	rs605113	T/C	10	100334369	-0.0861741	0.25664	0.737447	FALSE
TMAu	rs604761	T/G	10	100334390	-0.0861741	0.25664	0.737447	FALSE
TMAu	rs489289	G/A	10	100334533	0.0861741	0.25664	0.737447	FALSE
TMAu	rs576770	C/A	10	100334706	0.0861741	0.25664	0.737447	FALSE
TMAu	rs592142	G/A	10	100334898	0.0861741	0.25664	0.737447	FALSE
TMAu	rs573821	G/A	10	100335093	-0.0861741	0.25664	0.737447	FALSE
TMAu	rs4147142	T/C	10	100335865	0.236693	0.208767	0.26567	FALSE
TMAu	rs4919244	T/C	10	100336680	-0.236693	0.208767	0.26567	FALSE
TMAu	rs4919245	G/A	10	100336769	-0.236693	0.208767	0.26567	FALSE
TMAu	rs3853516	C/A	10	100338139	0.134479	0.138255	0.332997	FALSE
TMAu	rs7083561	G/C	10	100338879	-0.134479	0.138255	0.332997	FALSE
TMAu	rs3936941	T/G	10	100339741	0.123679	0.214108	0.566088	FALSE
TMAu	rs10883139	T/C	10	100339862	-0.134479	0.138255	0.332997	FALSE
TMAu	rs10883140	T/C	10	100340086	0.28827	0.15103	0.0591305	FALSE
TMAu	rs1932803	T/C	10	100342333	-0.0945936	0.140151	0.500083	FALSE
TMAu	rs10786444	G/C	10	100342794	-0.0426345	0.137927	0.757286	FALSE
TMAu	rs4917845	C/A	10	100342837	-0.224735	0.151197	0.140441	FALSE
TMAu	rs11189691	G/C	10	100343408	-0.0715814	0.139989	0.609473	FALSE
TMAu	rs1111289	T/C	10	100343534	0.109342	0.145867	0.455002	FALSE
TMAu	rs10736134	T/C	10	100344124	-0.441976	0.268117	0.102785	FALSE
TMAu	rs11189692	T/C	10	100344136	-0.441897	0.192501	0.0237337	FALSE
TMAu	rs10786445	T/C	10	100344209	-0.0476709	0.140845	0.735156	FALSE
TMAu	rs10883141	T/C	10	100344439	-0.0715814	0.139989	0.609473	FALSE
TMAu	rs10883142	T/C	10	100344481	-0.0476709	0.140845	0.735156	FALSE
TMAu	rs11189693	G/C	10	100344692	0.0193338	0.139177	0.889523	FALSE
TMAu	rs11189694	T/C	10	100344905	0.0476709	0.140845	0.735156	FALSE
TMAu	rs11189698	T/C	10	100345376	-0.0715814	0.139989	0.609473	FALSE
TMAu	rs10786446	T/C	10	100345973	0.0476709	0.140845	0.735156	FALSE
TMAu	rs2184817	T/C	10	100346589	0.224735	0.151197	0.140441	FALSE
TMAu	rs17460851	G/A	10	100346675	0.104734	0.272814	0.701597	FALSE
TMAu	rs6584214	T/C	10	100347450	-0.441976	0.268117	0.102785	FALSE
TMAu	rs3911759	T/C	10	100347848	0.104734	0.272814	0.701597	FALSE
TMAu	rs12268248	G/A	10	100347919	-0.0476709	0.140845	0.735156	FALSE
TMAu	rs3866908	G/A	10	100347968	0.441976	0.268117	0.102785	FALSE
TMAu	rs10786447	T/C	10	100348138	-0.224735	0.151197	0.140441	FALSE
TMAu	rs675410	G/A	10	100350322	0.409503	0.278801	0.145474	FALSE
TMAu	rs10883146	T/C	10	100350338	0.00302336	0.146433	0.983544	FALSE
TMAu	rs7099621	T/C	10	100352786	0.17317	0.148509	0.250013	FALSE
TMAu	rs12244614	T/G	10	100353616	-0.600603	0.286246	0.0387012	FALSE
TMAu	rs7090780	T/G	10	100358291	0.15927	0.15262	0.302935	FALSE
TMAu	rs502195	T/C	10	100359463	-0.497672	0.244729	0.0458756	FALSE
TMAu	rs12357870	G/A	10	100364827	-0.445459	0.189217	0.0205489	FALSE
TMAu	rs1462140	T/C	10	100366009	0.25194	0.29586	0.39922	FALSE
TMAu	rs10883150	T/C	10	100366731	-0.207296	0.20569	0.324589	FALSE
TMAu	rs7475778	T/C	10	100368893	-0.524811	0.234328	0.0294307	FALSE
TMAu	rs1462131	T/C	10	100369052	-0.781062	0.301148	0.0123695	FALSE
TMAu	rs4554816	T/G	10	100369397	0.780977	0.285197	0.00839226	FALSE
TMAu	rs10748746	T/C	10	100369538	0.602649	0.306822	0.0552694	FALSE
TMAu	rs526465	G/A	10	100370002	-0.381869	0.208916	0.0786808	FALSE
TMAu	rs12247273	G/A	10	100372515	-0.225585	0.267862	0.412535	FALSE
TMAu	rs10786449	C/A	10	100376145	-0.0564752	0.141451	0.689848	FALSE
TMAu	rs648003	T/C	10	100376798	0.0199542	0.145523	0.891726	FALSE
TMAu	rs546867	G/C	10	100377920	0.0420278	0.145392	0.773197	FALSE
TMAu	rs549665	T/C	10	100378224	-0.0420278	0.145392	0.773197	FALSE
TMAu	rs688501	T/C	10	100378911	0.0420278	0.145392	0.773197	FALSE
TMAu	rs10748747	T/A	10	100379179	0.0977851	0.143146	0.496545	FALSE
N-ACu	rs6728147	T/C	2	73423490	0.0885911	0.140486	0.52851	FALSE
N-ACu	rs6711278	T/C	2	73425019	0.0759073	0.153473	0.621039	FALSE
N-ACu	rs7599223	G/A	2	73427103	0.0829388	0.142725	0.561325	FALSE
N-ACu	rs10175626	G/A	2	73430541	-0.283313	0.151824	0.0775638	FALSE
N-ACu	rs11902788	T/C	2	73434358	0.283313	0.151824	0.0775638	FALSE
N-ACu	rs13415504	T/C	2	73435026	-0.283313	0.151824	0.0775638	FALSE
N-ACu	rs1864490	T/G	2	73435387	-0.414567	0.151842	0.0120668	FALSE
N-ACu	rs7560520	T/A	2	73436523	0.414567	0.151842	0.0120668	FALSE
N-ACu	rs2276545	G/A	2	73441597	0.223197	0.134143	0.10213	FALSE
N-ACu	rs17008864	T/C	2	73442516	-0.155771	0.201592	0.470155	FALSE
N-ACu	rs7557285	G/A	2	73442812	-0.0624381	0.138856	0.653622	FALSE
N-ACu	rs7605115	G/C	2	73446819	0.0687872	0.173064	0.69585	FALSE
N-ACu	rs2303905	G/A	2	73447736	0.223197	0.134143	0.10213	FALSE
N-ACu	rs2303904	G/A	2	73447775	-0.145314	0.12884	0.265822	FALSE
N-ACu	rs2288632	T/C	2	73448174	-0.129065	0.241259	0.605362	FALSE
N-ACu	rs17008885	T/A	2	73450139	-0.215837	0.136813	0.120989	FALSE
N-ACu	rs11893547	T/C	2	73451404	-0.129065	0.241259	0.605362	FALSE
N-ACu	rs2288631	T/C	2	73455747	-0.193853	0.137429	0.165452	FALSE
N-ACu	rs2288630	T/C	2	73457552	0.0834503	0.144176	0.56289	FALSE
N-ACu	rs1053329	C/A	2	73461483	0.193853	0.137429	0.165452	FALSE
N-ACu	rs1474298	G/A	2	73466592	0.193853	0.137429	0.165452	FALSE
N-ACu	rs7594590	G/A	2	73468467	0.225072	0.248629	0.371331	FALSE
N-ACu	rs2303907	T/C	2	73470497	-0.10306	0.141775	0.468047	FALSE
N-ACu	rs12464589	G/A	2	73470615	-0.692058	0.218418	0.00241388	FALSE
N-ACu	rs1018342	T/G	2	73471653	0.215837	0.136813	0.120989	FALSE
N-ACu	rs12465780	G/A	2	73472012	-0.0770927	0.145463	0.596249	FALSE
N-ACu	rs12104774	T/G	2	73472424	0.692058	0.218418	0.00241388	FALSE
N-ACu	rs7557055	G/A	2	73472670	-0.0770927	0.145463	0.596249	FALSE
N-ACu	rs3820701	G/A	2	73473211	0.225072	0.248629	0.371331	FALSE
N-ACu	rs909065	T/C	2	73477351	0.215837	0.136813	0.120989	FALSE
N-ACu	rs7851	T/A	2	73478461	-0.215837	0.136813	0.120989	FALSE
N-ACu	rs1991612	G/C	2	73480501	-0.0770927	0.145463	0.596249	FALSE
N-ACu	rs1045902	T/C	2	73483057	-0.10306	0.141775	0.468047	FALSE
N-ACu	rs1218	G/C	2	73483186	0.673713	0.180571	0.000318077	FALSE
N-ACu	rs502930	T/C	2	73492220	0.239579	0.16129	0.140511	FALSE
N-ACu	rs7609407	G/A	2	73500128	-0.422849	0.170333	0.0158993	FALSE
N-ACu	rs546576	G/A	2	73501453	0.414752	0.19499	0.037091	FALSE
N-ACu	rs6546815	T/A	2	73505905	-0.422849	0.170333	0.0158993	FALSE
N-ACu	rs6737049	G/A	2	73506711	0.494099	0.192628	0.0130283	FALSE
N-ACu	rs17349049	G/A	2	73529077	-0.805686	0.139612	2.6628e-07	FALSE
N-ACu	rs6546818	T/C	2	73530309	0.30153	0.164638	0.0698211	FALSE
N-ACu	rs6546819	T/C	2	73530356	0.30153	0.164638	0.0698211	FALSE
N-ACu	rs6737648	G/A	2	73531300	0.30153	0.164638	0.0698211	FALSE
N-ACu	rs1317734	T/G	2	73534263	-0.30153	0.164638	0.0698211	FALSE
N-ACu	rs6711843	G/A	2	73537537	-0.194574	0.167827	0.24787	FALSE
N-ACu	rs13033768	T/A	2	73539603	-0.30153	0.164638	0.0698211	FALSE
N-ACu	rs869927	G/A	2	73542685	-0.484333	0.198532	0.0187125	FALSE
N-ACu	rs6706562	G/C	2	73548787	0.791282	0.133663	1.14107e-07	FALSE
N-ACu	rs7573275	G/A	2	73552542	-0.880752	0.11425	1.40148e-11	FALSE
N-ACu	rs11885217	G/A	2	73553208	0.880752	0.11425	1.40148e-11	FALSE
N-ACu	rs6546820	G/A	2	73553397	-0.880752	0.11425	1.40148e-11	FALSE
N-ACu	rs1522927	T/G	2	73556155	-0.854804	0.112367	2.28648e-11	FALSE
N-ACu	rs10191517	G/A	2	73558403	-0.880752	0.11425	1.40148e-11	FALSE
N-ACu	rs7560272	T/A	2	73561485	0.880752	0.11425	1.40148e-11	FALSE
N-ACu	rs2091022	G/A	2	73564570	-0.880752	0.11425	1.40148e-11	FALSE
N-ACu	rs11126395	G/A	2	73564964	0.880752	0.11425	1.40148e-11	FALSE
N-ACu	rs11126396	T/C	2	73565143	0.880752	0.11425	1.40148e-11	FALSE
N-ACu	rs7604588	G/A	2	73571417	-0.880752	0.11425	1.40148e-11	FALSE
N-ACu	rs10196402	C/A	2	73572081	0.880752	0.11425	1.40148e-11	FALSE
N-ACu	rs11899517	G/A	2	73573261	0.825812	0.12278	1.29863e-09	FALSE
N-ACu	rs6718864	G/A	2	73574591	0.825812	0.12278	1.29863e-09	FALSE
N-ACu	rs6546822	G/A	2	73575098	-0.825812	0.12278	1.29863e-09	FALSE
N-ACu	rs6709853	T/A	2	73576065	-0.825812	0.12278	1.29863e-09	FALSE
N-ACu	rs6713196	T/C	2	73576405	-0.825812	0.12278	1.29863e-09	FALSE
N-ACu	rs6706179	T/C	2	73578577	0.825812	0.12278	1.29863e-09	FALSE
N-ACu	rs4330127	T/A	2	73581320	0.825812	0.12278	1.29863e-09	FALSE
N-ACu	rs10198301	T/A	2	73581600	-0.825812	0.12278	1.29863e-09	FALSE
N-ACu	rs7573719	G/A	2	73582986	-0.825812	0.12278	1.29863e-09	FALSE
N-ACu	rs12478346	T/C	2	73584360	0.825812	0.12278	1.29863e-09	FALSE
N-ACu	rs6546824	G/A	2	73587331	-0.825812	0.12278	1.29863e-09	FALSE
N-ACu	rs6716776	T/C	2	73587713	-0.825812	0.12278	1.29863e-09	FALSE
N-ACu	rs6720094	T/C	2	73588076	-0.825812	0.12278	1.29863e-09	FALSE
N-ACu	rs4641966	G/A	2	73590806	-0.825812	0.12278	1.29863e-09	FALSE
N-ACu	rs1522926	T/C	2	73591241	-0.825812	0.12278	1.29863e-09	FALSE
N-ACu	rs2421489	G/A	2	73593448	0.825812	0.12278	1.29863e-09	FALSE
N-ACu	rs7574291	T/C	2	73594941	-0.825812	0.12278	1.29863e-09	FALSE
N-ACu	rs1403412	T/C	2	73598092	-0.825812	0.12278	1.29863e-09	FALSE
N-ACu	rs6546826	T/C	2	73599808	0.825812	0.12278	1.29863e-09	FALSE
N-ACu	rs7586361	G/A	2	73601606	-0.825812	0.12278	1.29863e-09	FALSE
N-ACu	rs6740173	G/C	2	73602266	0.825812	0.12278	1.29863e-09	FALSE
N-ACu	rs6546827	T/C	2	73606493	0.849324	0.115376	5.63342e-11	FALSE
N-ACu	rs6706409	C/A	2	73606508	0.849324	0.115376	5.63342e-11	FALSE
N-ACu	rs6710659	G/A	2	73607510	0.849324	0.115376	5.63342e-11	FALSE
N-ACu	rs6747145	G/A	2	73609177	-0.849324	0.115376	5.63342e-11	FALSE
N-ACu	rs6748040	G/A	2	73609928	-0.849324	0.115376	5.63342e-11	FALSE
N-ACu	rs17008991	G/A	2	73610116	-0.840614	0.223809	0.000326715	FALSE
N-ACu	rs10165862	T/C	2	73610743	0.849324	0.115376	5.63342e-11	FALSE
N-ACu	rs7576824	G/A	2	73611281	0.849324	0.115376	5.63342e-11	FALSE
N-ACu	rs12465867	T/C	2	73612102	0.849324	0.115376	5.63342e-11	FALSE
N-ACu	rs11126399	G/A	2	73613341	-0.849324	0.115376	5.63342e-11	FALSE
N-ACu	rs6706235	G/C	2	73613558	0.849324	0.115376	5.63342e-11	FALSE
N-ACu	rs6546829	G/C	2	73613789	0.849324	0.115376	5.63342e-11	FALSE
N-ACu	rs11689392	T/C	2	73622026	-1.00858	0.0975336	9.58792e-17	TRUE
N-ACu	rs1852647	T/C	2	73633921	-0.283665	0.220822	0.212023	FALSE
N-ACu	rs7580825	G/A	2	73635148	-1.00858	0.0975336	9.58792e-17	TRUE
N-ACu	rs10179134	G/A	2	73637519	1.00858	0.0975336	9.58792e-17	TRUE
N-ACu	rs10496190	G/C	2	73638823	0.858715	0.116553	5.95341e-11	FALSE
N-ACu	rs2421545	T/C	2	73639476	0.84233	0.112615	3.78334e-11	FALSE
N-ACu	rs2421546	C/A	2	73641077	-0.84233	0.112615	3.78334e-11	FALSE
N-ACu	rs2421548	G/A	2	73641240	-0.84233	0.112615	3.78334e-11	FALSE
N-ACu	rs6755217	T/C	2	73641285	1.00858	0.0975336	9.58792e-17	TRUE
N-ACu	rs12995433	T/C	2	73641326	-0.84233	0.112615	3.78334e-11	FALSE
N-ACu	rs6755241	T/C	2	73641364	1.00858	0.0975336	9.58792e-17	TRUE
N-ACu	rs4852927	T/C	2	73641557	-0.84233	0.112615	3.78334e-11	FALSE
N-ACu	rs7564890	T/C	2	73641853	-1.00858	0.0975336	9.58792e-17	TRUE
N-ACu	rs6546831	T/A	2	73642072	-0.283665	0.220822	0.212023	FALSE
N-ACu	rs6730785	C/A	2	73642403	-0.84233	0.112615	3.78334e-11	FALSE
N-ACu	rs6734450	G/A	2	73643182	0.283665	0.220822	0.212023	FALSE
N-ACu	rs11684858	T/G	2	73643627	0.462924	0.275718	0.0970637	FALSE
N-ACu	rs17349321	T/C	2	73643753	0.908095	0.14125	8.17633e-09	FALSE
N-ACu	rs1918863	G/A	2	73644481	1.00858	0.0975336	9.58792e-17	TRUE
N-ACu	rs1881244	G/A	2	73645089	-0.851301	0.19253	5.98523e-05	FALSE
N-ACu	rs1534471	G/A	2	73647508	-1.00858	0.0975336	9.58792e-17	TRUE
N-ACu	rs6705489	T/G	2	73648811	1.00858	0.0975336	9.58792e-17	TRUE
N-ACu	rs6546832	G/A	2	73649352	0.283665	0.220822	0.212023	FALSE
N-ACu	rs4852305	T/G	2	73649733	-0.283665	0.220822	0.212023	FALSE
N-ACu	rs1881245	G/A	2	73649928	-1.00858	0.0975336	9.58792e-17	TRUE
N-ACu	rs1881246	T/A	2	73650122	0.84233	0.112615	3.78334e-11	FALSE
N-ACu	rs1881247	T/C	2	73650695	-0.283665	0.220822	0.212023	FALSE
N-ACu	rs1881248	G/A	2	73651389	0.283665	0.220822	0.212023	FALSE
N-ACu	rs3813227	T/C	2	73651967	1.00858	0.0975336	9.58792e-17	TRUE
N-ACu	rs7598396	G/A	2	73652628	1.00858	0.0975336	9.58792e-17	TRUE
N-ACu	rs6753344	G/A	2	73653138	1.00858	0.0975336	9.58792e-17	TRUE
N-ACu	rs6740223	T/C	2	73653332	-1.00858	0.0975336	9.58792e-17	TRUE
N-ACu	rs6707722	G/A	2	73654363	-1.00858	0.0975336	9.58792e-17	TRUE
N-ACu	rs12996463	T/C	2	73655496	0.84233	0.112615	3.78334e-11	FALSE
N-ACu	rs10190219	T/C	2	73658331	1.00858	0.0975336	9.58792e-17	TRUE
N-ACu	rs2421550	G/A	2	73658686	1.00858	0.0975336	9.58792e-17	TRUE
N-ACu	rs2178154	T/C	2	73661738	-0.84233	0.112615	3.78334e-11	FALSE
N-ACu	rs6546833	T/C	2	73661849	0.283665	0.220822	0.212023	FALSE
N-ACu	rs6546834	G/A	2	73662087	0.283665	0.220822	0.212023	FALSE
N-ACu	rs12713783	C/A	2	73663481	0.283665	0.220822	0.212023	FALSE
N-ACu	rs6546835	G/A	2	73664715	-1.00858	0.0975336	9.58792e-17	TRUE
N-ACu	rs2901438	G/A	2	73665656	-1.00858	0.0975336	9.58792e-17	TRUE
N-ACu	rs6746458	T/C	2	73665866	-0.283665	0.220822	0.212023	FALSE
N-ACu	rs7585004	G/C	2	73666645	-1.00858	0.0975336	9.58792e-17	TRUE
N-ACu	rs1528169	T/C	2	73669186	0.84233	0.112615	3.78334e-11	FALSE
N-ACu	rs10192125	G/A	2	73671229	0.283665	0.220822	0.212023	FALSE
N-ACu	rs10519309	T/C	2	73672629	-0.482271	0.264941	0.0725831	FALSE
N-ACu	rs10175180	T/C	2	73673123	1.00858	0.0975336	9.58792e-17	TRUE
N-ACu	rs10496191	T/C	2	73673798	0.974758	0.0964922	3.145e-16	TRUE
N-ACu	rs1406105	T/G	2	73674261	0.311806	0.196829	0.11571	FALSE
N-ACu	rs12104768	T/C	2	73674966	-0.851301	0.19253	5.98523e-05	FALSE
N-ACu	rs2037814	T/G	2	73675669	-0.302292	0.199869	0.141564	FALSE
N-ACu	rs7598901	T/C	2	73675844	-0.84233	0.112615	3.78334e-11	FALSE
N-ACu	rs6546836	G/A	2	73677833	1.00858	0.0975336	9.58792e-17	TRUE
N-ACu	rs6546837	G/C	2	73677898	-1.00858	0.0975336	9.58792e-17	TRUE
N-ACu	rs6546838	G/A	2	73679280	1.00858	0.0975336	9.58792e-17	TRUE
N-ACu	rs10496192	T/C	2	73679866	-0.908095	0.14125	8.17633e-09	FALSE
N-ACu	rs6724782	T/A	2	73679990	-1.00858	0.0975336	9.58792e-17	TRUE
N-ACu	rs6546839	G/C	2	73680508	-1.00858	0.0975336	9.58792e-17	TRUE
N-ACu	rs7594511	G/A	2	73681639	1.00858	0.0975336	9.58792e-17	TRUE
N-ACu	rs6749680	G/A	2	73685852	0.797208	0.114534	6.26535e-10	FALSE
N-ACu	rs6756987	T/G	2	73687077	1.00858	0.0975336	9.58792e-17	TRUE
N-ACu	rs9807961	G/A	2	73694043	1.00858	0.0975336	9.58792e-17	TRUE
N-ACu	rs1246105	T/G	2	73694160	-0.283665	0.220822	0.212023	FALSE
N-ACu	rs780396	G/A	2	73694764	-0.370268	0.206369	0.0753358	FALSE
N-ACu	rs10189574	C/A	2	73698518	-1.00858	0.0975336	9.58792e-17	TRUE
N-ACu	rs780395	G/A	2	73700853	0.84233	0.112615	3.78334e-11	FALSE
N-ACu	rs780394	G/A	2	73700930	-0.84233	0.112615	3.78334e-11	FALSE
N-ACu	rs1083922	T/C	2	73704003	0.84233	0.112615	3.78334e-11	FALSE
N-ACu	rs1246096	T/A	2	73705088	0.283665	0.220822	0.212023	FALSE
N-ACu	rs1083919	G/C	2	73713863	-0.84233	0.112615	3.78334e-11	FALSE
N-ACu	rs3820700	G/A	2	73716810	0.283665	0.220822	0.212023	FALSE
N-ACu	rs2017116	G/C	2	73717103	0.283665	0.220822	0.212023	FALSE
N-ACu	rs2056486	T/G	2	73717567	1.00858	0.0975336	9.58792e-17	TRUE
N-ACu	rs10193972	G/A	2	73717656	0.980159	0.0950835	1.04992e-16	TRUE
N-ACu	rs13421462	C/A	2	73719875	1.00858	0.0975336	9.58792e-17	TRUE
N-ACu	rs13398956	C/A	2	73720258	-1.00858	0.0975336	9.58792e-17	TRUE
N-ACu	rs11901272	G/A	2	73720444	1.00858	0.0975336	9.58792e-17	TRUE
N-ACu	rs11674602	T/A	2	73723185	1.00858	0.0975336	9.58792e-17	TRUE
N-ACu	rs13384952	G/A	2	73723959	0.975442	0.0965201	3.80519e-16	TRUE
N-ACu	rs7572722	T/C	2	73724675	-1.00858	0.0975336	9.58792e-17	TRUE
N-ACu	rs7562047	T/G	2	73725168	0.84233	0.112615	3.78334e-11	FALSE
N-ACu	rs10189578	C/A	2	73728609	-0.84233	0.112615	3.78334e-11	FALSE
N-ACu	rs7607014	G/A	2	73730174	1.00858	0.0975336	9.58792e-17	TRUE
N-ACu	rs1589576	G/A	2	73738804	0.95188	0.136206	7.06726e-10	FALSE
N-ACu	rs7598660	G/A	2	73740425	-0.858715	0.116553	5.95341e-11	FALSE
N-ACu	rs10865398	T/G	2	73741497	0.84233	0.112615	3.78334e-11	FALSE
N-ACu	rs9309473	G/A	2	73743982	1.05784	0.0910285	4.1418e-19	TRUE
N-ACu	rs17349685	G/A	2	73744123	-0.462924	0.275718	0.0970637	FALSE
N-ACu	rs6711033	T/C	2	73746643	-1.05784	0.0910261	4.1418e-19	TRUE
N-ACu	rs11884776	T/C	2	73746923	1.00858	0.0975336	9.58792e-17	TRUE
N-ACu	rs10170849	G/A	2	73747932	-1.00858	0.0975336	9.58792e-17	TRUE
N-ACu	rs13392691	G/A	2	73748980	-1.00858	0.0975336	9.58792e-17	TRUE
N-ACu	rs6707146	T/C	2	73749076	-1.05784	0.0910261	4.1418e-19	TRUE
N-ACu	rs11685372	T/C	2	73749461	0.283665	0.220822	0.212023	FALSE
N-ACu	rs10469966	G/A	2	73752368	-1.04876	0.0981775	2.63713e-17	TRUE
N-ACu	rs7566385	T/G	2	73756817	1.00174	0.104573	3.04685e-15	TRUE
N-ACu	rs11688718	T/C	2	73760939	0.84233	0.112615	3.78334e-11	FALSE
N-ACu	rs10199224	G/C	2	73761446	1.00858	0.0975336	9.58792e-17	TRUE
N-ACu	rs3738848	G/A	2	73761881	-1.05784	0.0910261	4.1418e-19	TRUE
N-ACu	rs6729468	C/A	2	73765253	-0.84233	0.112615	3.78334e-11	FALSE
N-ACu	rs6744697	T/C	2	73765438	-0.84233	0.112615	3.78334e-11	FALSE
N-ACu	rs6704782	T/A	2	73766454	1.00858	0.0975336	9.58792e-17	TRUE
N-ACu	rs13386124	G/C	2	73771695	-0.84233	0.112615	3.78334e-11	FALSE
N-ACu	rs10496193	G/A	2	73773503	-1.05784	0.0910261	4.1418e-19	TRUE
N-ACu	rs11689588	G/A	2	73773691	1.05784	0.0910285	4.1418e-19	TRUE
N-ACu	rs13008860	G/A	2	73774019	-0.858715	0.116553	5.95341e-11	FALSE
N-ACu	rs11126402	G/C	2	73776582	-0.809791	0.114429	2.67787e-10	FALSE
N-ACu	rs11679594	G/A	2	73779507	-0.908095	0.14125	8.17633e-09	FALSE
N-ACu	rs6740766	G/A	2	73780913	1.03475	0.094155	9.0067e-18	TRUE
N-ACu	rs17349804	T/A	2	73783160	-0.398344	0.222404	0.0843616	FALSE
N-ACu	rs10207220	G/C	2	73785046	-0.985876	0.10032	1.27149e-15	TRUE
N-ACu	rs6546847	G/A	2	73785358	1.03475	0.094155	9.0067e-18	TRUE
N-ACu	rs10169213	G/C	2	73787234	-1.03475	0.0941547	9.0067e-18	TRUE
N-ACu	rs7604682	G/A	2	73788026	-1.03475	0.0941547	9.0067e-18	TRUE
N-ACu	rs6735946	G/A	2	73790058	1.03475	0.094155	9.0067e-18	TRUE
N-ACu	rs17009149	T/C	2	73790368	-1.03475	0.0941547	9.0067e-18	TRUE
N-ACu	rs7566315	T/C	2	73791808	0.809791	0.114429	2.67787e-10	FALSE
N-ACu	rs17349818	G/A	2	73792207	1.01197	0.249543	0.000160604	FALSE
N-ACu	rs10190002	T/C	2	73794054	0.809791	0.114429	2.67787e-10	FALSE
N-ACu	rs10198549	G/A	2	73794404	1.03475	0.094155	9.0067e-18	TRUE
N-ACu	rs9653557	C/A	2	73795962	0.985876	0.10032	1.27149e-15	TRUE
N-ACu	rs11126404	T/A	2	73796924	-0.985876	0.10032	1.27149e-15	TRUE
N-ACu	rs10185080	C/A	2	73797507	-0.985876	0.10032	1.27149e-15	TRUE
N-ACu	rs10197755	T/A	2	73797623	-0.985876	0.10032	1.27149e-15	TRUE
N-ACu	rs17009159	T/A	2	73797762	0.985876	0.10032	1.27149e-15	TRUE
N-ACu	rs7583255	T/G	2	73797996	-1.03475	0.0941547	9.0067e-18	TRUE
N-ACu	rs7598419	G/A	2	73798223	0.985876	0.10032	1.27149e-15	TRUE
N-ACu	rs7586463	T/C	2	73798476	-0.985876	0.10032	1.27149e-15	TRUE
N-ACu	rs1114380	G/A	2	73804708	0.985876	0.10032	1.27149e-15	TRUE
N-ACu	rs6756885	G/A	2	73805172	1.03475	0.094155	9.0067e-18	TRUE
N-ACu	rs10169714	T/G	2	73808773	-1.03475	0.0941547	9.0067e-18	TRUE
N-ACu	rs6745368	T/C	2	73809974	0.985876	0.10032	1.27149e-15	TRUE
N-ACu	rs7558944	T/G	2	73810909	-1.03475	0.0941547	9.0067e-18	TRUE
N-ACu	rs13432605	G/C	2	73810981	0.985876	0.10032	1.27149e-15	TRUE
N-ACu	rs7603647	G/A	2	73817238	-0.985876	0.10032	1.27149e-15	TRUE
N-ACu	rs7607892	T/C	2	73818707	0.985876	0.10032	1.27149e-15	TRUE
N-ACu	rs13391552	G/A	2	73818936	-0.985876	0.10032	1.27149e-15	TRUE
N-ACu	rs6710438	G/C	2	73820108	-1.03475	0.0941547	9.0067e-18	TRUE
N-ACu	rs2948441	G/A	2	73825770	0.398344	0.222404	0.0843616	FALSE
N-ACu	rs6732440	T/G	2	73827099	0.809791	0.114429	2.67787e-10	FALSE
N-ACu	rs6745560	G/A	2	73827117	-0.809791	0.114429	2.67787e-10	FALSE
N-ACu	rs1320374	T/C	2	73828310	0.809791	0.114429	2.67787e-10	FALSE
N-ACu	rs1052161	G/A	2	73828538	0.809791	0.114429	2.67787e-10	FALSE
N-ACu	rs1052162	T/C	2	73829372	0.985876	0.10032	1.27149e-15	TRUE
N-ACu	rs6546849	G/A	2	73831037	1.03475	0.094155	9.0067e-18	TRUE
N-ACu	rs6546850	T/A	2	73831147	1.03475	0.094155	9.0067e-18	TRUE
N-ACu	rs4852936	T/C	2	73831358	0.398344	0.222404	0.0843616	FALSE
N-ACu	rs6546851	T/C	2	73833283	0.985876	0.10032	1.27149e-15	TRUE
N-ACu	rs6546852	G/A	2	73833431	-1.03475	0.0941547	9.0067e-18	TRUE
N-ACu	rs6546853	G/A	2	73833739	-1.03475	0.0941547	9.0067e-18	TRUE
N-ACu	rs4852937	T/C	2	73834084	0.398344	0.222404	0.0843616	FALSE
N-ACu	rs6546856	T/C	2	73837751	-1.03475	0.0941547	9.0067e-18	TRUE
N-ACu	rs6546857	G/A	2	73837955	1.03475	0.094155	9.0067e-18	TRUE
N-ACu	rs6546858	G/A	2	73838613	-1.03475	0.0941547	9.0067e-18	TRUE
N-ACu	rs6745480	G/A	2	73840055	-1.03475	0.0941547	9.0067e-18	TRUE
N-ACu	rs2421577	T/G	2	73840998	0.985876	0.10032	1.27149e-15	TRUE
N-ACu	rs6546859	C/A	2	73842055	-1.03475	0.0941547	9.0067e-18	TRUE
N-ACu	rs4346412	T/C	2	73843571	-0.809791	0.114429	2.67787e-10	FALSE
N-ACu	rs4436991	G/C	2	73843631	0.398344	0.222404	0.0843616	FALSE
N-ACu	rs7609034	G/C	2	73843869	0.398344	0.222404	0.0843616	FALSE
N-ACu	rs6546860	G/A	2	73844249	-1.03475	0.0941547	9.0067e-18	TRUE
N-ACu	rs13427832	G/A	2	73844818	-0.985876	0.10032	1.27149e-15	TRUE
N-ACu	rs7570014	G/A	2	73845803	0.283665	0.220822	0.212023	FALSE
N-ACu	rs6726694	G/A	2	73847230	1.0993	0.110366	9.5842e-16	TRUE
N-ACu	rs6705977	G/C	2	73849170	1.03475	0.094155	9.0067e-18	TRUE
N-ACu	rs4241256	T/C	2	73853509	0.283665	0.220822	0.212023	FALSE
N-ACu	rs4852939	G/C	2	73856769	-0.809791	0.114429	2.67787e-10	FALSE
N-ACu	rs4852940	G/A	2	73857002	0.398344	0.222404	0.0843616	FALSE
N-ACu	rs10188074	G/A	2	73858120	-0.815173	0.124624	4.42809e-09	FALSE
N-ACu	rs10187867	C/A	2	73858124	-0.740918	0.14426	1.62509e-06	FALSE
N-ACu	rs2421660	T/G	2	73858325	0.398344	0.222404	0.0843616	FALSE
N-ACu	rs2421662	G/C	2	73858744	0.283665	0.220822	0.212023	FALSE
N-ACu	rs2421663	G/A	2	73858830	0.398344	0.222404	0.0843616	FALSE
N-ACu	rs2421664	T/C	2	73858881	-0.809791	0.114429	2.67787e-10	FALSE
N-ACu	rs3980654	T/A	2	73859047	-0.294474	0.219613	0.219748	FALSE
N-ACu	rs12472502	T/C	2	73859184	-0.809791	0.114429	2.67787e-10	FALSE
N-ACu	rs6546862	G/A	2	73860348	0.809791	0.114429	2.67787e-10	FALSE
N-ACu	rs6546863	G/A	2	73860396	-0.398344	0.222404	0.0843616	FALSE
N-ACu	rs4852310	C/A	2	73860525	0.398344	0.222404	0.0843616	FALSE
N-ACu	rs12620569	T/G	2	73861603	0.398344	0.222404	0.0843616	FALSE
N-ACu	rs2421588	T/C	2	73862224	-0.398344	0.222404	0.0843616	FALSE
N-ACu	rs1879666	G/A	2	73862922	-0.398344	0.222404	0.0843616	FALSE
N-ACu	rs4852949	T/C	2	73863486	0.283665	0.220822	0.212023	FALSE
N-ACu	rs12151671	T/C	2	73865115	0.283665	0.220822	0.212023	FALSE
N-ACu	rs4328656	T/G	2	73867460	0.306853	0.212729	0.152536	FALSE
N-ACu	rs13538	G/A	2	73868328	1.03475	0.094155	9.0067e-18	TRUE
N-ACu	rs6744273	G/A	2	73869120	-0.294474	0.219613	0.219748	FALSE
N-ACu	rs2280507	T/C	2	73869558	-0.398344	0.222404	0.0843616	FALSE
N-ACu	rs2280506	T/C	2	73869666	0.398344	0.222404	0.0843616	FALSE
N-ACu	rs4852951	G/C	2	73869796	-0.809791	0.114429	2.67787e-10	FALSE
N-ACu	rs4852311	G/A	2	73870929	-0.398344	0.222404	0.0843616	FALSE
N-ACu	rs12991161	G/A	2	73871371	0.809791	0.114429	2.67787e-10	FALSE
N-ACu	rs13410232	T/A	2	73871689	1.03475	0.094155	9.0067e-18	TRUE
N-ACu	rs11126411	G/A	2	73875702	0.398344	0.222404	0.0843616	FALSE
N-ACu	rs12478871	T/C	2	73875920	0.398344	0.222404	0.0843616	FALSE
N-ACu	rs6759452	T/C	2	73878352	0.95188	0.136206	7.06726e-10	FALSE
N-ACu	rs7607989	G/A	2	73878827	-0.398344	0.222404	0.0843616	FALSE
N-ACu	rs4852959	C/A	2	73880601	0.809791	0.114429	2.67787e-10	FALSE
N-ACu	rs2421669	G/A	2	73886630	0.347738	0.22355	0.137583	FALSE
N-ACu	rs2421581	G/A	2	73889737	0.347738	0.22355	0.137583	FALSE
N-ACu	rs12618600	T/C	2	73890682	0.809791	0.114429	2.67787e-10	FALSE
N-ACu	rs13017182	T/G	2	73891004	-0.817824	0.112624	1.07702e-10	FALSE
N-ACu	rs6546870	G/A	2	73896603	0.347738	0.22355	0.137583	FALSE
N-ACu	rs13027816	T/C	2	73897691	-0.817824	0.112624	1.07702e-10	FALSE
N-ACu	rs2421582	G/A	2	73898420	-0.794788	0.117924	1.16703e-09	FALSE
N-ACu	rs2421583	G/C	2	73898785	-0.817824	0.112624	1.07702e-10	FALSE
N-ACu	rs2421586	T/C	2	73899719	-0.817824	0.112624	1.07702e-10	FALSE
N-ACu	rs2421587	G/A	2	73900329	-0.347738	0.22355	0.137583	FALSE
N-ACu	rs7579068	G/C	2	73900844	0.347738	0.22355	0.137583	FALSE
N-ACu	rs10206899	T/C	2	73900900	-1.03475	0.0941547	9.0067e-18	TRUE
N-ACu	rs4511748	G/A	2	73902491	-0.347738	0.22355	0.137583	FALSE
N-ACu	rs6742619	T/C	2	73905591	0.596696	0.130418	3.62511e-05	FALSE
N-ACu	rs12620018	G/A	2	73906408	0.803492	0.112811	2.10026e-10	FALSE
N-ACu	rs12620074	G/C	2	73906598	0.731584	0.122955	1.0499e-07	FALSE
N-ACu	rs12620091	T/C	2	73906819	-0.762922	0.115122	2.97117e-09	FALSE
N-ACu	rs2421574	G/C	2	73908767	-0.774526	0.114295	1.10643e-09	FALSE
N-ACu	rs12997018	G/A	2	73912899	-0.774526	0.114295	1.10643e-09	FALSE
N-ACu	rs7608328	G/A	2	73914019	0.774526	0.114295	1.10643e-09	FALSE
N-ACu	rs12611487	T/C	2	73916453	-0.754018	0.127783	7.01442e-08	FALSE
N-ACu	rs4852972	T/C	2	73916672	-0.704653	0.12381	1.74844e-07	FALSE
N-ACu	rs13000788	T/C	2	73918312	-0.754018	0.127783	7.01442e-08	FALSE
N-ACu	rs2421575	G/A	2	73919522	0.754018	0.127783	7.01442e-08	FALSE
N-ACu	rs4852316	G/A	2	73919658	0.754018	0.127783	7.01442e-08	FALSE
N-ACu	rs13014700	G/C	2	73920121	-0.754018	0.127783	7.01442e-08	FALSE
N-ACu	rs13015885	T/G	2	73920482	-0.754018	0.127783	7.01442e-08	FALSE
N-ACu	rs6732812	T/C	2	73922475	0.754018	0.127783	7.01442e-08	FALSE
N-ACu	rs17350056	G/A	2	73922877	0.754018	0.127783	7.01442e-08	FALSE
N-ACu	rs17434634	T/A	2	73922926	0.754018	0.127783	7.01442e-08	FALSE
N-ACu	rs17434655	T/C	2	73923089	0.754018	0.127783	7.01442e-08	FALSE
N-ACu	rs13006448	T/G	2	73924424	-0.754018	0.127783	7.01442e-08	FALSE
N-ACu	rs13013228	G/A	2	73925216	0.754018	0.127783	7.01442e-08	FALSE
N-ACu	rs4852974	G/A	2	73927931	-0.468769	0.166291	0.00825862	FALSE
N-ACu	rs2001490	G/C	2	73928098	-0.754018	0.127783	7.01442e-08	FALSE
N-ACu	rs2001436	T/A	2	73928965	-0.754018	0.127783	7.01442e-08	FALSE
N-ACu	rs2947845	G/A	2	73930356	-0.268011	0.220971	0.244322	FALSE
N-ACu	rs12998980	C/A	2	73930726	-0.754018	0.127783	7.01442e-08	FALSE
N-ACu	rs11689234	T/C	2	73931716	0.649623	0.148819	5.83919e-05	FALSE
N-ACu	rs12233112	G/A	2	73931764	0.754018	0.127783	7.01442e-08	FALSE
N-ACu	rs11126414	G/A	2	73932044	0.754018	0.127783	7.01442e-08	FALSE
N-ACu	rs4852975	T/C	2	73932465	-0.754018	0.127783	7.01442e-08	FALSE
N-ACu	rs12619258	T/G	2	73935915	-0.754018	0.127783	7.01442e-08	FALSE
N-ACu	rs17350125	C/A	2	73936184	-0.754018	0.127783	7.01442e-08	FALSE
N-ACu	rs4852976	T/C	2	73936322	0.754018	0.127783	7.01442e-08	FALSE
N-ACu	rs11126415	T/C	2	73936500	-0.754018	0.127783	7.01442e-08	FALSE
N-ACu	rs12052539	G/A	2	73937153	-0.754018	0.127783	7.01442e-08	FALSE
N-ACu	rs12053242	G/A	2	73937168	0.754018	0.127783	7.01442e-08	FALSE
N-ACu	rs7599453	T/G	2	73937901	0.754018	0.127783	7.01442e-08	FALSE
N-ACu	rs4852977	T/C	2	73938295	-0.754018	0.127783	7.01442e-08	FALSE
N-ACu	rs1815028	G/A	2	73938926	-0.753275	0.125948	4.91054e-08	FALSE
N-ACu	rs1806683	T/C	2	73939812	0.753275	0.125948	4.91054e-08	FALSE
N-ACu	rs6748233	G/A	2	73941002	0.753275	0.125948	4.91054e-08	FALSE
N-ACu	rs6755500	G/A	2	73942233	0.753275	0.125948	4.91054e-08	FALSE
N-ACu	rs4852978	G/A	2	73943110	0.753275	0.125948	4.91054e-08	FALSE
N-ACu	rs11891140	G/A	2	73944084	-0.753275	0.125948	4.91054e-08	FALSE
N-ACu	rs7591112	T/C	2	73944272	-0.753275	0.125948	4.91054e-08	FALSE
N-ACu	rs12713789	G/A	2	73945600	-0.753275	0.125948	4.91054e-08	FALSE
N-ACu	rs12713790	T/C	2	73945611	-0.753275	0.125948	4.91054e-08	FALSE
N-ACu	rs12713791	T/C	2	73945733	-0.753275	0.125948	4.91054e-08	FALSE
N-ACu	rs6749841	T/C	2	73946097	-0.753275	0.125948	4.91054e-08	FALSE
N-ACu	rs6750494	G/A	2	73946496	0.727045	0.129401	2.15649e-07	FALSE
N-ACu	rs6750515	G/A	2	73946533	0.727045	0.129401	2.15649e-07	FALSE
N-ACu	rs6750877	G/A	2	73946813	0.727045	0.129401	2.15649e-07	FALSE
N-ACu	rs12615807	T/C	2	73947583	0.727045	0.129401	2.15649e-07	FALSE
N-ACu	rs2006997	G/A	2	73947846	0.727045	0.129401	2.15649e-07	FALSE
N-ACu	rs2421675	C/A	2	73955301	0.727045	0.129401	2.15649e-07	FALSE
N-ACu	rs2421674	G/A	2	73955432	0.727045	0.129401	2.15649e-07	FALSE
N-ACu	rs2421672	G/A	2	73955540	0.727045	0.129401	2.15649e-07	FALSE
N-ACu	rs17009372	G/A	2	73955571	-0.609841	0.156275	0.000210055	FALSE
N-ACu	rs12713793	T/C	2	73956114	0.727045	0.129401	2.15649e-07	FALSE
N-ACu	rs7210	G/A	2	73957124	-0.727045	0.129402	2.15649e-07	FALSE
N-ACu	rs13003035	T/A	2	73957227	0.72586	0.131311	3.16637e-07	FALSE
N-ACu	rs12713795	T/A	2	73959935	0.72586	0.131311	3.16637e-07	FALSE
N-ACu	rs12992607	T/G	2	73959960	-0.72586	0.131311	3.16637e-07	FALSE
N-ACu	rs11894953	T/C	2	73964631	-0.72586	0.131311	3.16637e-07	FALSE
N-ACu	rs17350188	G/C	2	73964842	0.72586	0.131311	3.16637e-07	FALSE
N-ACu	rs11126416	G/A	2	73973877	-0.72586	0.131311	3.16637e-07	FALSE
N-ACu	rs2272178	T/C	2	73977609	-0.72586	0.131311	3.16637e-07	FALSE
N-ACu	rs2567601	T/G	2	73985167	-0.772789	0.159234	5.55555e-06	FALSE
N-ACu	rs2567603	G/C	2	73986125	-0.772789	0.159234	5.55555e-06	FALSE
N-ACu	rs12713798	T/C	2	73986421	-0.72586	0.131311	3.16637e-07	FALSE
N-ACu	rs12624267	T/C	2	73986931	-0.72586	0.131311	3.16637e-07	FALSE
N-ACu	rs11892172	G/A	2	73997952	0.72586	0.131311	3.16637e-07	FALSE
N-ACu	rs2421559	G/A	2	73999654	0.72586	0.131311	3.16637e-07	FALSE
N-ACu	rs2116367	T/C	2	74000701	-0.72586	0.131311	3.16637e-07	FALSE
N-ACu	rs2272051	T/C	2	74007136	0.72586	0.131311	3.16637e-07	FALSE
N-ACu	rs3813228	G/A	2	74007345	-0.72586	0.131311	3.16637e-07	FALSE
N-ACu	rs2685277	G/C	2	74010265	0.547429	0.218142	0.0151897	FALSE
N-ACu	rs2462127	G/A	2	74048826	-0.699522	0.130282	6.72664e-07	FALSE
N-ACu	rs10203740	G/A	2	74051360	-0.732596	0.128661	1.68295e-07	FALSE
N-ACu	rs10193032	T/C	2	74051612	0.361267	0.136942	0.0134764	FALSE
N-ACu	rs17434855	T/C	2	74055697	-0.256652	0.233825	0.289417	FALSE
N-ACu	rs17009399	G/C	2	74056313	-0.818865	0.246559	0.00233807	FALSE
N-ACu	rs3813229	G/A	2	74056564	0.318382	0.143648	0.0320341	FALSE
N-ACu	rs4852983	T/G	2	74058894	0.318382	0.143648	0.0320341	FALSE
N-ACu	rs6546875	T/C	2	74063673	-0.284502	0.145032	0.0568619	FALSE
N-ACu	rs1474335	G/A	2	74066461	-0.0829537	0.152124	0.586538	FALSE
N-ACu	rs7594485	T/C	2	74070186	0.338317	0.143644	0.0238752	FALSE
N-ACu	rs1036113	T/C	2	74071151	0.338317	0.143644	0.0238752	FALSE
N-ACu	rs11904306	T/C	2	74076269	0.818865	0.246559	0.00233807	FALSE
N-ACu	rs17404009	G/A	2	74079765	0.353884	0.322228	0.2749	FALSE
N-ACu	rs11888468	T/G	2	74086550	-0.818865	0.246559	0.00233807	FALSE
N-ACu	rs1318987	C/A	2	74086687	-0.126543	0.171647	0.462378	FALSE
N-ACu	rs1025424	T/C	2	74087290	-0.0560592	0.161423	0.728918	FALSE
N-ACu	rs13409194	G/A	2	74087329	0.818865	0.246559	0.00233807	FALSE
N-ACu	rs13384232	C/A	2	74087710	-0.818865	0.246559	0.00233807	FALSE
N-ACu	rs6726010	T/C	2	74091327	-0.200516	0.153263	0.199859	FALSE
N-ACu	rs10192291	T/G	2	74091674	-0.818865	0.246559	0.00233807	FALSE
N-ACu	rs11126418	G/A	2	74091725	0.818865	0.246559	0.00233807	FALSE
N-ACu	rs3738846	T/C	2	74091805	0.25337	0.154152	0.11129	FALSE
N-ACu	rs11126419	T/C	2	74092119	0.7684	0.239745	0.00315598	FALSE
N-ACu	rs13402321	G/C	2	74092844	0.818865	0.246559	0.00233807	FALSE
N-ACu	rs3813230	T/C	2	74093652	-0.337547	0.152826	0.0331609	FALSE
N-ACu	rs3813231	T/A	2	74093682	-0.337547	0.152826	0.0331609	FALSE
N-ACu	rs7570391	T/G	2	74093833	0.818865	0.246559	0.00233807	FALSE
N-ACu	rs6720781	T/C	2	74095347	-0.818865	0.246559	0.00233807	FALSE
N-ACu	rs17009428	T/C	2	74097050	-0.395506	0.221201	0.0889438	FALSE
N-ACu	rs17009433	T/C	2	74100011	-0.303274	0.222745	0.193527	FALSE
BAIBu	rs7712424	T/C	5	34837695	0.113548	0.258802	0.661891	FALSE
BAIBu	rs1056115	G/C	5	34838085	-0.0311673	0.139817	0.823922	FALSE
BAIBu	rs336484	T/G	5	34839111	-0.0878021	0.132908	0.509799	FALSE
BAIBu	rs336485	G/A	5	34839428	0.212754	0.197092	0.285085	FALSE
BAIBu	rs10078917	T/C	5	34839548	-0.113548	0.258802	0.661891	FALSE
BAIBu	rs10078924	C/A	5	34839574	0.113548	0.258802	0.661891	FALSE
BAIBu	rs17523495	T/C	5	34840488	-0.211118	0.185618	0.260026	FALSE
BAIBu	rs6451173	G/A	5	34840841	-0.089509	0.139105	0.526706	FALSE
BAIBu	rs17523585	T/C	5	34843716	0.00750892	0.155619	0.96176	FALSE
BAIBu	rs4703479	T/C	5	34844054	0.00750892	0.155619	0.96176	FALSE
BAIBu	rs13158027	T/C	5	34844389	-0.00750892	0.155619	0.96176	FALSE
BAIBu	rs336486	C/A	5	34845473	0.102261	0.171579	0.554475	FALSE
BAIBu	rs336487	T/C	5	34846353	0.113548	0.258802	0.661891	FALSE
BAIBu	rs336489	G/A	5	34846812	-0.14266	0.141824	0.316678	FALSE
BAIBu	rs336490	T/C	5	34848180	0.0782783	0.148027	0.597879	FALSE
BAIBu	rs336491	T/C	5	34848332	-0.113548	0.258802	0.661891	FALSE
BAIBu	rs336492	T/C	5	34848826	-0.0774415	0.138187	0.57571	FALSE
BAIBu	rs336493	T/G	5	34849743	-0.113548	0.258802	0.661891	FALSE
BAIBu	rs336494	T/A	5	34849791	-0.102261	0.171579	0.554475	FALSE
BAIBu	rs338295	G/A	5	34853700	0.113548	0.258802	0.661891	FALSE
BAIBu	rs4703480	T/G	5	34853784	-0.102508	0.171545	0.553894	FALSE
BAIBu	rs447933	T/C	5	34853965	0.102261	0.171579	0.554475	FALSE
BAIBu	rs10521018	G/C	5	34854011	0.288071	0.200224	0.154116	FALSE
BAIBu	rs442382	T/A	5	34854278	0.0877419	0.245568	0.72148	FALSE
BAIBu	rs10521019	G/A	5	34854281	-0.288071	0.200224	0.154116	FALSE
BAIBu	rs368823	G/A	5	34854491	-0.246611	0.163528	0.136079	FALSE
BAIBu	rs6892899	T/C	5	34855623	0.0774415	0.138187	0.57571	FALSE
BAIBu	rs6897717	T/C	5	34856148	0.0220899	0.142753	0.877098	FALSE
BAIBu	rs16868532	G/A	5	34856805	-0.0922787	0.13648	0.499638	FALSE
BAIBu	rs16868533	C/A	5	34856874	0.0391709	0.140869	0.781088	FALSE
BAIBu	rs16868534	G/A	5	34857445	0.0922787	0.13648	0.499638	FALSE
BAIBu	rs16868536	T/C	5	34857470	0.0922787	0.13648	0.499638	FALSE
BAIBu	rs6869117	G/A	5	34858483	0.0922787	0.13648	0.499638	FALSE
BAIBu	rs163233	G/A	5	34859225	0.0298145	0.146557	0.839434	FALSE
BAIBu	rs336470	T/C	5	34859409	-0.0105977	0.14667	0.942642	FALSE
BAIBu	rs336469	G/A	5	34859716	-0.0482551	0.142968	0.736058	FALSE
BAIBu	rs3857367	G/C	5	34860430	-0.288071	0.200224	0.154116	FALSE
BAIBu	rs465230	G/A	5	34860520	-0.113548	0.258802	0.661891	FALSE
BAIBu	rs461328	T/C	5	34860624	0.113548	0.258802	0.661891	FALSE
BAIBu	rs460207	T/C	5	34860718	-0.113548	0.258802	0.661891	FALSE
BAIBu	rs16868603	G/C	5	34861616	-0.286915	0.136816	0.0392584	FALSE
BAIBu	rs11744123	T/C	5	34862125	0.36809	0.158547	0.0232932	FALSE
BAIBu	rs10941221	T/A	5	34862360	0.377904	0.143318	0.00990062	FALSE
BAIBu	rs4703481	G/A	5	34862541	0.0970409	0.191694	0.614718	FALSE
BAIBu	rs3906383	T/A	5	34863034	0.200117	0.214834	0.355054	FALSE
BAIBu	rs3846632	T/G	5	34863220	-0.357473	0.151809	0.0204442	FALSE
BAIBu	rs3846633	T/C	5	34863933	0.239087	0.1361	0.084792	FALSE
BAIBu	rs13167483	G/A	5	34865528	-0.378731	0.14973	0.01304	FALSE
BAIBu	rs17615134	G/A	5	34866806	0.198874	0.188491	0.292501	FALSE
BAIBu	rs10461949	T/C	5	34868792	0.488585	0.146448	0.00131119	FALSE
BAIBu	rs6877989	G/A	5	34871932	-0.513109	0.137956	0.000363912	FALSE
BAIBu	rs10941223	T/C	5	34872544	0.377604	0.147994	0.0122976	FALSE
BAIBu	rs12515572	T/A	5	34873928	0.198874	0.188491	0.292501	FALSE
BAIBu	rs12523132	G/A	5	34873967	0.198874	0.188491	0.292501	FALSE
BAIBu	rs11948433	G/A	5	34875814	0.377604	0.147994	0.0122976	FALSE
BAIBu	rs2892623	C/A	5	34878150	-0.198874	0.188491	0.292501	FALSE
BAIBu	rs17303001	T/C	5	34882421	-0.198874	0.188491	0.292501	FALSE
BAIBu	rs153013	T/C	5	34885215	0.502801	0.135946	0.000385952	FALSE
BAIBu	rs17303064	G/A	5	34886968	0.266093	0.187727	0.158892	FALSE
BAIBu	rs13168113	T/G	5	34888511	-0.377604	0.147994	0.0122976	FALSE
BAIBu	rs17243742	T/G	5	34890256	0.0847011	0.310106	0.788075	FALSE
BAIBu	rs153012	G/A	5	34890728	-0.419692	0.17269	0.0170341	FALSE
BAIBu	rs153017	G/A	5	34891108	0.397404	0.175454	0.0272623	FALSE
BAIBu	rs340991	G/A	5	34892042	-0.469918	0.166301	0.0063651	FALSE
BAIBu	rs7707427	T/C	5	34894630	0.395698	0.146919	0.00855087	FALSE
BAIBu	rs251638	T/C	5	34898304	-0.469918	0.166301	0.0063651	FALSE
BAIBu	rs251637	C/A	5	34900350	-0.425528	0.147128	0.00489924	FALSE
BAIBu	rs1805327	T/C	5	34908877	-0.230468	0.197157	0.244521	FALSE
BAIBu	rs2069476	G/A	5	34909994	0.285383	0.177631	0.110267	FALSE
BAIBu	rs2069473	T/C	5	34912357	-0.278251	0.207869	0.185105	FALSE
BAIBu	rs37436	T/C	5	34912819	0.509097	0.168907	0.00370894	FALSE
BAIBu	rs2069470	G/A	5	34914404	-0.230468	0.197157	0.244521	FALSE
BAIBu	rs2069469	G/A	5	34915201	0.230468	0.197157	0.244521	FALSE
BAIBu	rs2069464	T/G	5	34916059	-0.230468	0.197157	0.244521	FALSE
BAIBu	rs37434	G/A	5	34918415	0.469918	0.166301	0.0063651	FALSE
BAIBu	rs37433	T/C	5	34920257	-0.469918	0.166301	0.0063651	FALSE
BAIBu	rs3776603	G/A	5	34924502	-0.3767	0.145991	0.0115987	FALSE
BAIBu	rs2270934	G/A	5	34924857	0.230468	0.197157	0.244521	FALSE
BAIBu	rs27162	C/A	5	34928514	0.460031	0.155867	0.00439108	FALSE
BAIBu	rs2303136	G/A	5	34934117	-0.286226	0.191173	0.137247	FALSE
BAIBu	rs40202	G/A	5	34938373	0.419569	0.157495	0.0097348	FALSE
BAIBu	rs17304123	T/A	5	34939794	0.286226	0.191173	0.137247	FALSE
BAIBu	rs251640	T/C	5	34942537	0.442942	0.158256	0.00669817	FALSE
BAIBu	rs17304200	G/A	5	34945122	0.286226	0.191173	0.137247	FALSE
BAIBu	rs6864139	G/A	5	34945663	-0.333325	0.13618	0.0168134	FALSE
BAIBu	rs37440	T/C	5	34948532	-0.324649	0.139036	0.0223244	FALSE
BAIBu	rs37439	C/A	5	34951150	-0.233706	0.18968	0.219519	FALSE
BAIBu	rs17244979	G/C	5	34954079	0.286226	0.191173	0.137247	FALSE
BAIBu	rs17304438	G/A	5	34955550	-0.286226	0.191173	0.137247	FALSE
BAIBu	rs17304494	T/C	5	34956609	0.286226	0.191173	0.137247	FALSE
BAIBu	rs251636	T/C	5	34957444	0.0449538	0.149817	0.764381	FALSE
BAIBu	rs12153787	G/A	5	34957827	0.250294	0.194382	0.200311	FALSE
BAIBu	rs153008	G/C	5	34961357	-0.395041	0.16302	0.0171161	FALSE
BAIBu	rs10941225	T/A	5	34961480	0.324649	0.139036	0.0223244	FALSE
BAIBu	rs17304626	T/G	5	34961583	0.0582721	0.248392	0.81471	FALSE
BAIBu	rs17304654	T/C	5	34961672	0.286226	0.191173	0.137247	FALSE
BAIBu	rs12152945	G/A	5	34971268	0.286226	0.191173	0.137247	FALSE
BAIBu	rs460053	G/A	5	34971390	0.387124	0.141685	0.00767031	FALSE
BAIBu	rs17304710	G/A	5	34972234	-0.286226	0.191173	0.137247	FALSE
BAIBu	rs13158182	G/A	5	34976174	0.531973	0.211753	0.0134995	FALSE
BAIBu	rs163585	T/C	5	34977408	0.438201	0.130696	0.00120948	FALSE
BAIBu	rs153009	G/A	5	34977542	-0.341516	0.173053	0.0522671	FALSE
BAIBu	rs163588	G/A	5	34978170	-0.452264	0.129173	0.000755629	FALSE
BAIBu	rs6451177	G/C	5	34978854	-0.0685508	0.183587	0.70979	FALSE
BAIBu	rs6451178	G/A	5	34978915	-0.0685508	0.183587	0.70979	FALSE
BAIBu	rs6451179	G/A	5	34978929	0.0685508	0.183587	0.70979	FALSE
BAIBu	rs6898640	T/C	5	34979441	-0.0229752	0.184828	0.901417	FALSE
BAIBu	rs163592	G/A	5	34980516	-0.312229	0.137213	0.0258247	FALSE
BAIBu	rs163594	C/A	5	34986704	0.332988	0.172428	0.0573974	FALSE
BAIBu	rs10521020	T/C	5	34986864	0.196804	0.179985	0.275445	FALSE
BAIBu	rs11957653	T/C	5	34987541	0.341516	0.173053	0.0522671	FALSE
BAIBu	rs149151	G/A	5	34989000	0.341516	0.173053	0.0522671	FALSE
BAIBu	rs163599	G/A	5	34991946	0.0552441	0.213457	0.797657	FALSE
BAIBu	rs16870205	T/C	5	34993030	0.113912	0.146598	0.438162	FALSE
BAIBu	rs11744796	G/A	5	34993215	0.310608	0.139679	0.0292701	FALSE
BAIBu	rs9687411	T/C	5	34994600	0.105169	0.150259	0.485176	FALSE
BAIBu	rs9687430	T/G	5	34994827	0.105169	0.150259	0.485176	FALSE
BAIBu	rs17304955	T/C	5	34996900	0.297259	0.228254	0.194635	FALSE
BAIBu	rs17245616	T/G	5	34997038	-0.0804859	0.162524	0.622667	FALSE
BAIBu	rs4518366	G/A	5	34997389	-0.444619	0.174284	0.0121437	FALSE
BAIBu	rs16899972	C/A	5	34998778	-0.320537	0.135302	0.0203108	FALSE
BAIBu	rs16899974	C/A	5	34998877	-0.444619	0.174284	0.0121437	FALSE
BAIBu	rs17245714	G/C	5	34998894	-0.297259	0.228254	0.194635	FALSE
BAIBu	rs9292570	T/C	5	35000312	-0.0405912	0.14949	0.788467	FALSE
BAIBu	rs7717823	T/C	5	35000795	-0.386798	0.128736	0.00346038	FALSE
BAIBu	rs163908	T/A	5	35001317	0.358507	0.133494	0.00884316	FALSE
BAIBu	rs13169995	G/C	5	35001678	0.386798	0.128736	0.00346038	FALSE
BAIBu	rs13170299	G/A	5	35001859	0.529521	0.236713	0.027339	FALSE
BAIBu	rs13173819	T/C	5	35001963	-0.400955	0.133052	0.0032826	FALSE
BAIBu	rs13173943	T/C	5	35002005	-0.386798	0.128736	0.00346038	FALSE
BAIBu	rs13174300	C/A	5	35002251	0.386798	0.128736	0.00346038	FALSE
BAIBu	rs13360881	G/C	5	35002750	0.112048	0.15482	0.470275	FALSE
BAIBu	rs468327	G/A	5	35003112	-0.653878	0.168952	0.00020064	FALSE
BAIBu	rs1979723	T/C	5	35003523	-0.18004	0.181579	0.322581	FALSE
BAIBu	rs4538595	T/C	5	35005021	-0.179511	0.130607	0.172937	FALSE
BAIBu	rs2894886	T/A	5	35005140	-0.179511	0.130607	0.172937	FALSE
BAIBu	rs1428281	T/C	5	35006151	-0.499014	0.153101	0.00153272	FALSE
BAIBu	rs2195352	G/A	5	35006192	0.378928	0.129651	0.00435937	FALSE
BAIBu	rs163841	G/A	5	35007085	0.335538	0.137984	0.0171703	FALSE
BAIBu	rs13163727	T/C	5	35007535	-0.378928	0.129651	0.00435937	FALSE
BAIBu	rs6893268	T/C	5	35008692	0.137581	0.182861	0.452421	FALSE
BAIBu	rs11960801	T/C	5	35010872	-0.320931	0.132674	0.0174381	FALSE
BAIBu	rs344166	C/A	5	35012107	0.0444004	0.130115	0.734005	FALSE
BAIBu	rs186937	T/C	5	35012425	0.373962	0.13277	0.00597741	FALSE
BAIBu	rs1973391	T/C	5	35013747	-0.320931	0.132674	0.0174381	FALSE
BAIBu	rs17246034	G/A	5	35014723	-0.0606414	0.150636	0.6879	FALSE
BAIBu	rs344165	G/A	5	35014881	0.0444004	0.130115	0.734005	FALSE
BAIBu	rs344164	G/A	5	35015198	0.0444004	0.130115	0.734005	FALSE
BAIBu	rs163907	T/C	5	35015297	0.0444004	0.130115	0.734005	FALSE
BAIBu	rs344519	T/C	5	35023034	-0.010221	0.119619	0.932138	FALSE
BAIBu	rs344518	T/A	5	35023187	0.0444004	0.130115	0.734005	FALSE
BAIBu	rs11949088	T/A	5	35024325	-0.0606414	0.150636	0.6879	FALSE
BAIBu	rs237553	C/A	5	35024618	0.0444004	0.130115	0.734005	FALSE
BAIBu	rs344515	G/A	5	35025770	-0.330715	0.131887	0.0140581	FALSE
BAIBu	rs13170466	T/C	5	35026239	-0.269954	0.135605	0.0497178	FALSE
BAIBu	rs13158903	T/C	5	35027807	0.373962	0.13277	0.00597741	FALSE
BAIBu	rs13172280	T/C	5	35027911	0.373962	0.13277	0.00597741	FALSE
BAIBu	rs3816930	T/C	5	35028272	-0.330715	0.131887	0.0140581	FALSE
BAIBu	rs10521021	T/G	5	35030311	0.263065	0.132671	0.0503796	FALSE
BAIBu	rs10941228	G/C	5	35030963	0.273664	0.135186	0.0461358	FALSE
BAIBu	rs13174848	G/A	5	35032542	0.212167	0.135441	0.121501	FALSE
BAIBu	rs237252	G/A	5	35032769	-0.263065	0.132671	0.0503796	FALSE
BAIBu	rs2291698	T/C	5	35033047	-0.263065	0.132671	0.0503796	FALSE
BAIBu	rs2291699	G/A	5	35033225	-0.273664	0.135186	0.0461358	FALSE
BAIBu	rs2291701	T/C	5	35033526	-0.212167	0.135441	0.121501	FALSE
BAIBu	rs2291702	T/C	5	35033706	-0.250261	0.134315	0.0657697	FALSE
BAIBu	rs344158	C/A	5	35034094	-0.263065	0.132671	0.0503796	FALSE
BAIBu	rs13185264	C/A	5	35034419	0.263065	0.132671	0.0503796	FALSE
BAIBu	rs344156	G/A	5	35035579	0.263065	0.132671	0.0503796	FALSE
BAIBu	rs344152	G/A	5	35036398	-0.263065	0.132671	0.0503796	FALSE
BAIBu	rs12519332	G/A	5	35036718	0.0346824	0.128471	0.787892	FALSE
BAIBu	rs37368	T/C	5	35036997	-0.0468238	0.139219	0.736944	FALSE
BAIBu	rs37369	T/C	5	35037115	1.53605	0.209236	5.8579e-11	TRUE
BAIBu	rs13177884	T/C	5	35038178	-0.225877	0.141219	0.114229	FALSE
BAIBu	rs11952305	C/A	5	35038582	-0.286039	0.139377	0.043052	FALSE
BAIBu	rs2279651	G/A	5	35039437	-0.369534	0.136799	0.0082234	FALSE
BAIBu	rs37370	T/C	5	35039486	-1.26335	0.183927	6.07046e-10	FALSE
BAIBu	rs17306298	T/C	5	35040081	-0.12811	0.157826	0.418948	FALSE
BAIBu	rs11950974	T/C	5	35040113	0.318466	0.136542	0.0218522	FALSE
BAIBu	rs37373	T/C	5	35042158	0.143665	0.159872	0.370949	FALSE
BAIBu	rs37374	G/A	5	35042203	-0.143665	0.159872	0.370949	FALSE
BAIBu	rs10521022	T/C	5	35043020	-0.286039	0.139377	0.043052	FALSE
BAIBu	rs10521023	G/A	5	35043115	0.12811	0.157826	0.418948	FALSE
BAIBu	rs13172279	T/G	5	35044165	-0.318466	0.136542	0.0218522	FALSE
BAIBu	rs28305	G/C	5	35044298	-1.26335	0.183927	6.07046e-10	FALSE
BAIBu	rs6896900	T/C	5	35044541	-0.318466	0.136542	0.0218522	FALSE
BAIBu	rs10038101	G/A	5	35044888	0.12811	0.157826	0.418948	FALSE
BAIBu	rs187490	G/A	5	35045127	-0.143665	0.159872	0.370949	FALSE
BAIBu	rs13177986	C/A	5	35045533	-0.286039	0.139377	0.043052	FALSE
BAIBu	rs40200	G/A	5	35045745	-1.26335	0.183927	6.07046e-10	FALSE
BAIBu	rs11952373	G/C	5	35045766	0.343137	0.13632	0.0138229	FALSE
BAIBu	rs37379	G/A	5	35045826	-1.26335	0.183927	6.07046e-10	FALSE
BAIBu	rs13184057	T/G	5	35046744	-0.225877	0.141219	0.114229	FALSE
BAIBu	rs40443	T/C	5	35046797	-0.0629488	0.160593	0.696196	FALSE
BAIBu	rs37381	G/A	5	35047211	0.0629488	0.160593	0.696196	FALSE
BAIBu	rs40201	T/C	5	35047845	-0.127759	0.163909	0.437017	FALSE
BAIBu	rs13177669	G/C	5	35048602	0.365934	0.204944	0.0778189	FALSE
BAIBu	rs1587059	G/C	5	35050508	0.0499782	0.16533	0.765792	FALSE
BAIBu	rs10941231	G/A	5	35052896	0.0499782	0.16533	0.765792	FALSE
BAIBu	rs2217286	T/C	5	35054333	0.282052	0.203031	0.172091	FALSE
BAIBu	rs10941232	G/A	5	35054639	0.0742402	0.14452	0.608237	FALSE
BAIBu	rs10805603	T/A	5	35054685	0.0928614	0.1748	0.598274	FALSE
BAIBu	rs249524	G/C	5	35060054	0.462513	0.186287	0.0144428	FALSE
BAIBu	rs249522	T/C	5	35060319	0.462513	0.186287	0.0144428	FALSE
BAIBu	rs173627	T/C	5	35060501	0.462513	0.186287	0.0144428	FALSE
BAIBu	rs249521	G/A	5	35060513	0.462513	0.186287	0.0144428	FALSE
BAIBu	rs387032	T/C	5	35061731	-0.462513	0.186287	0.0144428	FALSE
BAIBu	rs401694	T/C	5	35062618	0.390641	0.179868	0.0317268	FALSE
BAIBu	rs112461	T/A	5	35063292	0.372054	0.192546	0.0554939	FALSE
BAIBu	rs37364	T/G	5	35072380	-0.372054	0.192546	0.0554939	FALSE
BAIBu	rs249539	T/A	5	35074588	0.372054	0.192546	0.0554939	FALSE
BAIBu	rs37389	G/A	5	35085180	-0.353703	0.224556	0.117902	FALSE
BAIBu	rs37388	T/C	5	35085562	0.353703	0.224556	0.117902	FALSE
BAIBu	rs37387	T/C	5	35085600	0.353703	0.224556	0.117902	FALSE
BAIBu	rs43215	T/C	5	35086969	0.353703	0.224556	0.117902	FALSE
BAIBu	rs37385	T/C	5	35087801	0.300955	0.219315	0.173487	FALSE
BAIBu	rs17248083	T/C	5	35088833	0.157737	0.143373	0.272905	FALSE
BAIBu	rs249536	G/A	5	35089022	0.300955	0.219315	0.173487	FALSE
BAIBu	rs249537	G/A	5	35089300	-0.300955	0.219315	0.173487	FALSE
BAIBu	rs249538	G/C	5	35089400	0.478066	0.263643	0.072911	FALSE
BAIBu	rs37383	T/C	5	35092969	-0.300955	0.219315	0.173487	FALSE
BAIBu	rs37382	G/A	5	35093068	0.300955	0.219315	0.173487	FALSE
BAIBu	rs388541	G/A	5	35094824	-0.300955	0.219315	0.173487	FALSE
BAIBu	rs11740440	G/A	5	35101224	-0.175271	0.151711	0.249437	FALSE
BAIBu	rs7734558	G/A	5	35114611	0.0848974	0.147417	0.565135	FALSE
BAIBu	rs6860397	G/A	5	35115344	-0.0924935	0.269103	0.732856	FALSE
BAIBu	rs1966571	T/C	5	35117753	-0.35908	0.240718	0.13904	FALSE
BAIBu	rs7705243	T/C	5	35119546	0.0394803	0.161326	0.806861	FALSE
BAIBu	rs2962089	T/C	5	35132350	-0.322898	0.280907	0.25301	FALSE
BAIBu	rs2962090	T/C	5	35133429	-0.322898	0.280907	0.25301	FALSE
BAIBu	rs2962093	T/A	5	35134805	-0.322898	0.280907	0.25301	FALSE
BAIBu	rs2962094	T/C	5	35134877	0.0394803	0.161326	0.806861	FALSE
BAIBu	rs2962095	T/C	5	35134928	-0.322898	0.280907	0.25301	FALSE
BAIBu	rs2962096	G/A	5	35135000	-0.322898	0.280907	0.25301	FALSE
BAIBu	rs2962097	T/C	5	35135265	-0.322898	0.280907	0.25301	FALSE
BAIBu	rs2962098	G/C	5	35135648	-0.322898	0.280907	0.25301	FALSE
BAIBu	rs2962099	G/A	5	35135710	0.322898	0.280907	0.25301	FALSE
BAIBu	rs2962101	T/C	5	35135741	-0.0174485	0.240244	0.942219	FALSE
BAIBu	rs2962102	T/C	5	35135804	-0.322898	0.280907	0.25301	FALSE
BAIBu	rs2962104	G/A	5	35135946	-0.322898	0.280907	0.25301	FALSE
BAIBu	rs2962106	T/C	5	35136367	-0.322898	0.280907	0.25301	FALSE
BAIBu	rs2018170	T/G	5	35137166	-0.322898	0.280907	0.25301	FALSE
BAIBu	rs2914114	T/G	5	35138335	-0.322898	0.280907	0.25301	FALSE
BAIBu	rs2914112	G/A	5	35138788	-0.322898	0.280907	0.25301	FALSE
BAIBu	rs13181490	G/A	5	35139211	0.322898	0.280907	0.25301	FALSE
BAIBu	rs13182185	C/A	5	35139579	-0.322898	0.280907	0.25301	FALSE
BAIBu	rs2914110	T/C	5	35140426	-0.322898	0.280907	0.25301	FALSE
BAIBu	rs4343815	G/C	5	35143997	-0.322898	0.280907	0.25301	FALSE
BAIBu	rs4333296	C/A	5	35144066	0.322898	0.280907	0.25301	FALSE
BAIBu	rs2062699	T/C	5	35146644	-0.322898	0.280907	0.25301	FALSE
BAIBu	rs10434586	G/A	5	35147574	-0.322898	0.280907	0.25301	FALSE
BAIBu	rs4370254	G/A	5	35148071	0.322898	0.280907	0.25301	FALSE
BAIBu	rs4403155	T/G	5	35148527	-0.322898	0.280907	0.25301	FALSE
BAIBu	rs10078077	T/C	5	35149905	-0.322898	0.280907	0.25301	FALSE
BAIBu	rs1039431	T/C	5	35150787	-0.322898	0.280907	0.25301	FALSE
BAIBu	rs954286	T/C	5	35152241	-0.322898	0.280907	0.25301	FALSE
BAIBu	rs2047741	G/C	5	35153055	0.322898	0.280907	0.25301	FALSE
BAIBu	rs7732013	T/C	5	35156532	-0.264886	0.320784	0.41338	FALSE
BAIBu	rs6880595	G/A	5	35161332	0.0764427	0.162822	0.639347	FALSE
BAIBu	rs4703503	T/C	5	35162762	-0.157086	0.195971	0.425479	FALSE
BAIBu	rs1039426	G/A	5	35163821	0.00685727	0.151028	0.963923	FALSE
BAIBu	rs16872490	G/A	5	35164821	-0.00685727	0.151028	0.963923	FALSE
BAIBu	rs16872491	T/C	5	35164895	-0.119549	0.18913	0.527769	FALSE
BAIBu	rs1039428	T/G	5	35165597	-0.00685727	0.151028	0.963923	FALSE
BAIBu	rs1039427	T/C	5	35165935	-0.00685727	0.151028	0.963923	FALSE
BAIBu	rs12523281	T/C	5	35166570	0.167833	0.212175	0.43417	FALSE
BAIBu	rs11953869	T/C	5	35168145	-0.0206496	0.221987	0.926154	FALSE
BAIBu	rs7729932	G/A	5	35168370	0.0279083	0.150533	0.853396	FALSE
BAIBu	rs12518881	G/A	5	35169161	0.167833	0.212175	0.43417	FALSE
BAIBu	rs10941234	G/A	5	35169805	0.00685727	0.151028	0.963923	FALSE
BAIBu	rs13160159	G/A	5	35169986	0.00685727	0.151028	0.963923	FALSE
BAIBu	rs4703504	C/A	5	35171971	-0.374773	0.313681	0.234815	FALSE
BAIBu	rs4703505	G/A	5	35172021	0.00685727	0.151028	0.963923	FALSE
BAIBu	rs4703506	T/C	5	35172207	0.00685727	0.151028	0.963923	FALSE
BAIBu	rs13175591	T/C	5	35178748	-0.00685727	0.151028	0.963923	FALSE
BAIBu	rs11952661	G/A	5	35179360	-0.00685727	0.151028	0.963923	FALSE
BAIBu	rs6895193	G/A	5	35179593	0.0825686	0.155141	0.595481	FALSE
BAIBu	rs13154347	G/A	5	35181833	0.00685727	0.151028	0.963923	FALSE
BAIBu	rs10067710	T/A	5	35182406	0.0767907	0.142544	0.593408	FALSE
BAIBu	rs13158737	T/C	5	35182451	-0.00685727	0.151028	0.963923	FALSE
BAIBu	rs13159459	G/C	5	35182738	0.0206496	0.221987	0.926154	FALSE
BAIBu	rs7700286	T/C	5	35183752	0.0572742	0.230152	0.804436	FALSE
BAIBu	rs7713837	T/C	5	35183976	0.00685727	0.151028	0.963923	FALSE
BAIBu	rs12188108	T/C	5	35185435	0.00685727	0.151028	0.963923	FALSE
BAIBu	rs10941235	T/C	5	35185580	-0.00685727	0.151028	0.963923	FALSE
BAIBu	rs13436213	T/C	5	35185826	0.0767907	0.142544	0.593408	FALSE
BAIBu	rs4425481	C/A	5	35185897	-0.000519379	0.254325	0.99837	FALSE
BAIBu	rs12514672	T/C	5	35188257	-0.153518	0.215104	0.481051	FALSE
BAIBu	rs11956032	T/A	5	35188326	0.146388	0.28153	0.605409	FALSE
BAIBu	rs6897259	T/C	5	35188444	0.00930682	0.144332	0.948845	FALSE
BAIBu	rs12514742	T/G	5	35188476	-0.0360124	0.155217	0.817509	FALSE
BAIBu	rs4703508	T/C	5	35188802	-0.000519379	0.254325	0.99837	FALSE
BAIBu	rs7720754	G/A	5	35189215	-0.0379823	0.226249	0.8668	FALSE
BAIBu	rs12521272	G/A	5	35190327	-0.0938393	0.169491	0.582368	FALSE
BAIBu	rs6887898	G/A	5	35190748	0.0379823	0.226249	0.8668	FALSE
BAIBu	rs6891939	G/A	5	35190985	-0.0379823	0.226249	0.8668	FALSE
BAIBu	rs7705216	G/C	5	35193669	-0.153518	0.215104	0.481051	FALSE
BAIBu	rs12522419	T/C	5	35194944	0.153518	0.215104	0.481051	FALSE
BAIBu	rs12152833	G/A	5	35195171	0.207383	0.26575	0.435862	FALSE
BAIBu	rs1587606	G/A	5	35196430	-0.0379823	0.226249	0.8668	FALSE
BAIBu	rs17249539	G/C	5	35197370	0.153518	0.215104	0.481051	FALSE
BAIBu	rs12188786	T/C	5	35197382	0.207383	0.26575	0.435862	FALSE
BAIBu	rs17249574	G/A	5	35197560	0.153518	0.215104	0.481051	FALSE
BAIBu	rs7703435	G/C	5	35198324	0.0379823	0.226249	0.8668	FALSE
BAIBu	rs1587607	G/A	5	35198462	-0.0106026	0.184783	0.954545	FALSE
BAIBu	rs12153280	C/A	5	35199262	-0.152696	0.252307	0.54557	FALSE
BAIBu	rs9292573	G/A	5	35199433	0.077771	0.15622	0.621371	FALSE
BAIBu	rs873456	C/A	5	35199657	-0.077771	0.15622	0.621371	FALSE
BAIBu	rs4703509	T/C	5	35200194	0.0209868	0.168899	0.901507	FALSE
BAIBu	rs7718468	G/A	5	35201036	-0.00402293	0.147392	0.978259	FALSE
BAIBu	rs2047740	G/A	5	35203392	0.077771	0.15622	0.621371	FALSE
BAIBu	rs10447129	T/A	5	35204242	-0.0151932	0.228159	0.946933	FALSE
BAIBu	rs7707145	T/A	5	35204582	-0.0412073	0.156383	0.79377	FALSE
BAIBu	rs11959588	T/C	5	35204799	0.152696	0.252307	0.54557	FALSE
BAIBu	rs4235652	T/C	5	35209339	-0.18682	0.171563	0.278273	FALSE
BAIBu	rs1609500	C/A	5	35211240	0.077771	0.15622	0.621371	FALSE
BAIBu	rs6866465	T/C	5	35211774	-0.190676	0.220441	0.389722	FALSE
BAIBu	rs924599	T/C	5	35212684	0.190676	0.220441	0.389722	FALSE
BAIBu	rs9292574	T/C	5	35213496	0.077771	0.15622	0.621371	FALSE
BAIBu	rs9292575	T/G	5	35214505	0.190676	0.220441	0.389722	FALSE
BAIBu	rs10472950	T/C	5	35215469	0.190676	0.220441	0.389722	FALSE
BAIBu	rs1604421	G/A	5	35217376	-0.190676	0.220441	0.389722	FALSE
BAIBu	rs1604422	T/C	5	35217507	0.190676	0.220441	0.389722	FALSE
BAIBu	rs6451190	G/C	5	35217965	0.190676	0.220441	0.389722	FALSE
BAIBu	rs1587608	T/A	5	35218989	-0.00512494	0.172408	0.976669	FALSE
BAIBu	rs10073227	T/A	5	35220254	-0.259726	0.259328	0.320075	FALSE
BAIBu	rs10038062	T/C	5	35220519	-0.259726	0.259328	0.320075	FALSE
BAIBu	rs7731153	G/A	5	35220865	0.259726	0.259328	0.320075	FALSE
BAIBu	rs7731880	G/C	5	35221446	0.119035	0.247705	0.636488	FALSE
BAIBu	rs7732165	G/C	5	35221461	-0.119035	0.247705	0.636488	FALSE
BAIBu	rs931740	T/C	5	35222040	-0.00633571	0.193217	0.973917	FALSE
BAIBu	rs931741	G/C	5	35222051	-0.0471314	0.163408	0.77673	FALSE
BAIBu	rs10064495	T/C	5	35223013	-0.0471314	0.163408	0.77673	FALSE
BAIBu	rs1604427	G/C	5	35223610	0.0471314	0.163408	0.77673	FALSE
BAIBu	rs6878684	T/C	5	35223842	0.00633571	0.193217	0.973917	FALSE
BAIBu	rs1587610	T/C	5	35224242	0.0471314	0.163408	0.77673	FALSE
BAIBu	rs12697336	T/A	5	35224975	0.0471314	0.163408	0.77673	FALSE
BAIBu	rs13354826	G/A	5	35225147	-0.0238064	0.147088	0.871694	FALSE
BAIBu	rs10036454	G/A	5	35225617	-0.0471314	0.163408	0.77673	FALSE
BAIBu	rs7729876	T/G	5	35226101	-0.0505201	0.194003	0.795277	FALSE
BAIBu	rs4254878	T/C	5	35226579	0.00633571	0.193217	0.973917	FALSE
BAIBu	rs7735260	G/A	5	35227015	-0.119035	0.247705	0.636488	FALSE
BAIBu	rs1604428	T/C	5	35228048	0.141185	0.25714	0.585358	FALSE
BAIBu	rs6863018	G/A	5	35228753	0.0471314	0.163408	0.77673	FALSE
BAIBu	rs6867456	G/C	5	35229077	-0.00633571	0.193217	0.973917	FALSE
BAIBu	rs11738273	T/A	5	35229303	0.00633571	0.193217	0.973917	FALSE
BAIBu	rs7733450	T/A	5	35230152	-0.0426095	0.317134	0.896352	FALSE
BAIBu	rs7713385	G/A	5	35230210	0.119035	0.247705	0.636488	FALSE
BAIBu	rs10080135	T/C	5	35231987	0.1617	0.20245	0.429558	FALSE
BAIBu	rs3822482	G/A	5	35232227	0.04844	0.270518	0.870582	FALSE
BAIBu	rs6870964	T/A	5	35233102	0.1617	0.20245	0.429558	FALSE
BAIBu	rs10059874	G/A	5	35233786	0.0426095	0.317134	0.896352	FALSE
BAIBu	rs6451192	G/A	5	35234329	0.0426095	0.317134	0.896352	FALSE
BAIBu	rs13361664	T/C	5	35234843	0.0426095	0.317134	0.896352	FALSE
BAIBu	rs7712482	G/A	5	35235399	-0.0426095	0.317134	0.896352	FALSE
BAIBu	rs10941237	T/C	5	35235722	0.119035	0.247705	0.636488	FALSE
DMAp	rs17109059	G/C	10	99948236	-0.0805291	0.132174	0.545064	FALSE
DMAp	rs9651448	G/A	10	99948489	0.219138	0.115225	0.0670645	FALSE
DMAp	rs12780143	G/A	10	99949813	0.0657044	0.117247	0.575599	FALSE
DMAp	rs2025626	G/A	10	99952220	0.0657044	0.117247	0.575599	FALSE
DMAp	rs7071520	G/C	10	99952534	0.0657044	0.117247	0.575599	FALSE
DMAp	rs4919182	G/A	10	99953270	0.0027769	0.116586	0.981227	FALSE
DMAp	rs4919183	T/C	10	99953308	0.0657044	0.117247	0.575599	FALSE
DMAp	rs10786401	G/A	10	99953979	-0.0027769	0.116586	0.981227	FALSE
DMAp	rs7082394	C/A	10	99955351	-0.0027769	0.116586	0.981227	FALSE
DMAp	rs4919185	T/C	10	99958168	0.0576503	0.112794	0.609364	FALSE
DMAp	rs9420727	T/C	10	99958688	-0.0657044	0.117247	0.575599	FALSE
DMAp	rs1467644	G/A	10	99961158	-0.0805291	0.132174	0.545064	FALSE
DMAp	rs11189510	G/A	10	99962273	-0.391661	0.157525	0.0149851	FALSE
DMAp	rs10509720	G/A	10	99967115	0.0657044	0.117247	0.575599	FALSE
DMAp	rs11189513	G/A	10	99969568	-0.219138	0.115225	0.0670645	FALSE
DMAp	rs10883053	T/G	10	99972123	0.219138	0.115225	0.0670645	FALSE
DMAp	rs1359509	C/A	10	99973800	0.0805291	0.132174	0.545064	FALSE
DMAp	rs7906993	T/C	10	99974082	0.0805291	0.132174	0.545064	FALSE
DMAp	rs4919188	T/C	10	99974814	0.0657044	0.117247	0.575599	FALSE
DMAp	rs7078393	G/A	10	99976739	0.0657044	0.117247	0.575599	FALSE
DMAp	rs2862295	T/G	10	99980072	0.0805291	0.132174	0.545064	FALSE
DMAp	rs10748719	C/A	10	99986638	-0.0027769	0.116586	0.981227	FALSE
DMAp	rs10450402	G/A	10	99990493	0.0657044	0.117247	0.575599	FALSE
DMAp	rs11189521	T/A	10	99992206	-0.0657044	0.117247	0.575599	FALSE
DMAp	rs7900103	G/C	10	99993635	0.391662	0.157517	0.0149851	FALSE
DMAp	rs10748721	T/C	10	99999343	-0.0027769	0.116586	0.981227	FALSE
DMAp	rs1048757	G/C	10	100004441	0.0657044	0.117247	0.575599	FALSE
DMAp	rs3750595	C/A	10	100004906	0.0027769	0.116586	0.981227	FALSE
DMAp	rs10786405	T/C	10	100005282	-0.0027769	0.116586	0.981227	FALSE
DMAp	rs3793692	G/A	10	100008436	-0.0657044	0.117247	0.575599	FALSE
DMAp	rs737656	G/A	10	100012739	-0.109197	0.117553	0.354849	FALSE
DMAp	rs737657	G/A	10	100012890	-0.0657044	0.117247	0.575599	FALSE
DMAp	rs7086391	T/C	10	100013563	-0.00777428	0.133119	0.953954	FALSE
DMAp	rs878177	T/C	10	100013815	-0.211751	0.115332	0.0782788	FALSE
DMAp	rs878178	T/A	10	100013977	0.0657044	0.117247	0.575599	FALSE
DMAp	rs3763688	G/C	10	100015563	-0.391661	0.157525	0.0149851	FALSE
DMAp	rs3763689	T/G	10	100015603	-0.0805291	0.132174	0.545064	FALSE
DMAp	rs1983867	G/C	10	100016196	0.0027769	0.116586	0.981227	FALSE
DMAp	rs1983866	T/A	10	100016313	-0.184542	0.11493	0.120728	FALSE
DMAp	rs1983865	T/C	10	100016339	0.00640188	0.111628	0.954639	FALSE
DMAp	rs1983864	T/G	10	100017453	0.211751	0.115332	0.0782788	FALSE
DMAp	rs7077266	T/G	10	100019039	0.402722	0.162378	0.0157113	FALSE
DMAp	rs11189526	T/G	10	100020572	-0.0657044	0.117247	0.575599	FALSE
DMAp	rs735116	G/A	10	100021533	0.0657044	0.117247	0.575599	FALSE
DMAp	rs746257	G/A	10	100021983	-0.313336	0.171075	0.0683121	FALSE
DMAp	rs11189527	G/C	10	100023857	0.0657044	0.117247	0.575599	FALSE
DMAp	rs11189528	T/G	10	100023957	-0.0657044	0.117247	0.575599	FALSE
DMAp	rs12778335	T/C	10	100025095	-0.0657044	0.117247	0.575599	FALSE
DMAp	rs10748723	G/A	10	100025816	0.0757212	0.116916	0.517474	FALSE
DMAp	rs10736126	G/A	10	100025924	-0.0027769	0.116586	0.981227	FALSE
DMAp	rs7090035	G/C	10	100026791	0.0027769	0.116586	0.981227	FALSE
DMAp	rs7899882	T/C	10	100030768	-0.472235	0.141694	0.00112575	FALSE
DMAp	rs10786408	T/C	10	100031394	0.272727	0.101176	0.00820305	FALSE
DMAp	rs10883056	G/C	10	100031573	-0.355081	0.125427	0.00666438	FALSE
DMAp	rs10883057	G/C	10	100032037	0.242753	0.125348	0.056766	FALSE
DMAp	rs878259	G/A	10	100032289	0.242753	0.125348	0.056766	FALSE
DMAp	rs7910702	T/C	10	100034840	0.0810269	0.191127	0.671912	FALSE
DMAp	rs12784535	T/C	10	100034883	0.0166641	0.143425	0.908414	FALSE
DMAp	rs1365	C/A	10	100035666	0.0272464	0.190721	0.8865	FALSE
DMAp	rs7915743	T/C	10	100036209	-0.0426749	0.171212	0.803605	FALSE
DMAp	rs2094071	G/A	10	100037683	-0.132914	0.135658	0.330564	FALSE
DMAp	rs4376831	G/A	10	100042200	-0.0272464	0.190721	0.8865	FALSE
DMAp	rs4919201	G/A	10	100044928	-0.283113	0.130284	0.0314987	FALSE
DMAp	rs11599085	G/C	10	100046035	-0.18437	0.111745	0.10344	FALSE
DMAp	rs7905091	T/G	10	100046078	-0.343416	0.172532	0.0480848	FALSE
DMAp	rs1325499	G/A	10	100046679	0.306219	0.168582	0.0715116	FALSE
DMAp	rs11599733	G/A	10	100047185	-0.164955	0.116087	0.159115	FALSE
DMAp	rs10883059	T/C	10	100047501	-0.0353348	0.109568	0.748379	FALSE
DMAp	rs10748724	C/A	10	100047975	0.343417	0.172532	0.0480848	FALSE
DMAp	rs4919205	G/A	10	100049438	-0.125846	0.119597	0.294432	FALSE
DMAp	rs4919206	G/C	10	100049479	0.332897	0.10484	0.00193319	FALSE
DMAp	rs927741	T/C	10	100050356	-0.106544	0.110201	0.345027	FALSE
DMAp	rs7895376	T/C	10	100050681	0.129278	0.110504	0.254323	FALSE
DMAp	rs1925637	G/A	10	100051497	0.159603	0.109315	0.151081	FALSE
DMAp	rs11592082	T/A	10	100052464	-0.0340964	0.105355	0.747681	FALSE
DMAp	rs2182166	G/A	10	100052901	-0.0662948	0.112599	0.557032	FALSE
DMAp	rs6584182	T/C	10	100055644	-0.0112755	0.109083	0.918037	FALSE
DMAp	rs6584183	T/C	10	100056045	0.0112755	0.109083	0.918037	FALSE
DMAp	rs1925636	T/C	10	100057707	0.0109845	0.107642	0.919091	FALSE
DMAp	rs7098860	G/A	10	100058711	-0.183343	0.124879	0.150136	FALSE
DMAp	rs17453066	T/C	10	100060652	0.0796969	0.159866	0.618973	FALSE
DMAp	rs11189541	G/A	10	100066603	0.218027	0.112704	0.0571462	FALSE
DMAp	rs751160	G/C	10	100070040	-0.218028	0.112701	0.0571462	FALSE
DMAp	rs751159	T/A	10	100070243	-0.218028	0.112701	0.0571462	FALSE
DMAp	rs17453254	C/A	10	100070557	0.218027	0.112704	0.0571462	FALSE
DMAp	rs12764214	T/C	10	100072209	-0.183616	0.113855	0.111074	FALSE
DMAp	rs11189549	G/A	10	100073157	-0.195781	0.111918	0.0867172	FALSE
DMAp	rs1252902	C/A	10	100074095	-0.218028	0.112701	0.0571462	FALSE
DMAp	rs10883064	T/C	10	100074364	0.218027	0.112704	0.0571462	FALSE
DMAp	rs4917813	T/G	10	100074813	0.218027	0.112704	0.0571462	FALSE
DMAp	rs1252900	G/A	10	100075463	-0.205879	0.11398	0.0752305	FALSE
DMAp	rs4919207	G/A	10	100076354	-0.218028	0.112701	0.0571462	FALSE
DMAp	rs1252898	T/C	10	100076785	0.218027	0.112704	0.0571462	FALSE
DMAp	rs10748725	G/A	10	100076982	0.20374	0.120701	0.0989646	FALSE
DMAp	rs11189550	T/C	10	100077085	0.117064	0.260467	0.65391	FALSE
DMAp	rs11189551	T/C	10	100077152	0.117064	0.260467	0.65391	FALSE
DMAp	rs1252897	G/A	10	100077338	0.191327	0.111888	0.0915832	FALSE
DMAp	rs927739	T/C	10	100077732	0.191327	0.111888	0.0915832	FALSE
DMAp	rs1252895	T/C	10	100079947	-0.24581	0.117001	0.0394836	FALSE
DMAp	rs11599019	G/A	10	100080631	0.450565	0.108665	8.18914e-05	FALSE
DMAp	rs942800	C/A	10	100081443	-0.179945	0.122184	0.14694	FALSE
DMAp	rs2862297	C/A	10	100081757	-0.155303	0.113569	0.1779	FALSE
DMAp	rs7076493	C/A	10	100082385	-0.330843	0.177028	0.0648067	FALSE
DMAp	rs10786410	G/A	10	100082534	0.0736895	0.119335	0.53759	FALSE
DMAp	rs4917815	T/C	10	100082956	0.330844	0.177031	0.0648067	FALSE
DMAp	rs11189552	T/G	10	100083404	0.074266	0.107699	0.492856	FALSE
DMAp	rs1252890	T/G	10	100083643	-0.0955576	0.135187	0.486053	FALSE
DMAp	rs11189553	G/A	10	100084117	0.330844	0.177031	0.0648067	FALSE
DMAp	rs4917817	C/A	10	100085888	0.117578	0.119213	0.324905	FALSE
DMAp	rs4919209	T/G	10	100086341	-0.116558	0.136011	0.401605	FALSE
DMAp	rs6584185	T/C	10	100087228	-0.121624	0.137363	0.386682	FALSE
DMAp	rs4919210	T/C	10	100088262	-0.330843	0.177028	0.0648067	FALSE
DMAp	rs7075856	C/A	10	100089210	0.133784	0.150952	0.379019	FALSE
DMAp	rs7904756	G/A	10	100089728	-0.330843	0.177028	0.0648067	FALSE
DMAp	rs10883067	T/A	10	100090116	-0.133788	0.150946	0.379019	FALSE
DMAp	rs4919211	G/A	10	100090210	-0.091342	0.133923	0.501093	FALSE
DMAp	rs7097807	G/A	10	100091582	0.0955574	0.135188	0.486053	FALSE
DMAp	rs4917818	G/A	10	100092168	-0.091342	0.133923	0.501093	FALSE
DMAp	rs11189555	G/A	10	100092279	-0.013562	0.118936	0.909761	FALSE
DMAp	rs4919213	C/A	10	100093928	-0.330843	0.177028	0.0648067	FALSE
DMAp	rs1000280	G/A	10	100096148	-0.00391939	0.119077	0.973817	FALSE
DMAp	rs1536154	C/A	10	100096859	0.00963846	0.115906	0.934364	FALSE
DMAp	rs1536153	T/A	10	100096980	-0.00820461	0.117336	0.944787	FALSE
DMAp	rs7901537	T/C	10	100097469	-0.00963846	0.115906	0.934364	FALSE
DMAp	rs10883071	G/A	10	100097882	-0.00820461	0.117336	0.944787	FALSE
DMAp	rs746033	T/G	10	100098716	0.175081	0.123189	0.166592	FALSE
DMAp	rs4917819	C/A	10	100099508	0.00820461	0.117336	0.944787	FALSE
DMAp	rs17109450	T/G	10	100099651	-0.330843	0.177028	0.0648067	FALSE
DMAp	rs10883072	G/A	10	100100197	-0.181562	0.122429	0.144721	FALSE
DMAp	rs11189557	T/A	10	100100450	-0.15538	0.152989	0.312918	FALSE
DMAp	rs10748726	G/A	10	100100503	0.118869	0.131406	0.37496	FALSE
DMAp	rs2147892	G/C	10	100100772	-0.107665	0.119647	0.369656	FALSE
DMAp	rs753299	T/C	10	100101261	0.189571	0.145343	0.194742	FALSE
DMAp	rs750298	G/A	10	100102034	-0.185629	0.109463	0.103435	FALSE
DMAp	rs11189558	G/A	10	100102403	0.0035871	0.120548	0.976284	FALSE
DMAp	rs11189559	G/A	10	100102771	-0.08911	0.130069	0.494551	FALSE
DMAp	rs11189563	G/A	10	100104006	-0.084257	0.121084	0.493266	FALSE
DMAp	rs7081279	T/C	10	100104314	-0.224789	0.116292	0.0609155	FALSE
DMAp	rs4919218	T/C	10	100111392	-0.0802056	0.110862	0.473527	FALSE
DMAp	rs4917823	C/A	10	100111749	-0.0802056	0.110862	0.473527	FALSE
DMAp	rs4919220	G/A	10	100114954	0.25928	0.11867	0.0319215	FALSE
DMAp	rs765456	G/A	10	100114965	0.25928	0.11867	0.0319215	FALSE
DMAp	rs4919221	T/C	10	100115027	-0.25928	0.11867	0.0319215	FALSE
DMAp	rs11189569	T/C	10	100116197	0.496173	0.200047	0.0143794	FALSE
DMAp	rs4568939	T/A	10	100116611	0.259507	0.115998	0.031015	FALSE
DMAp	rs4917828	T/C	10	100116726	0.25301	0.127122	0.0487523	FALSE
DMAp	rs4491153	G/A	10	100117054	0.321659	0.113961	0.00574902	FALSE
DMAp	rs11189572	T/C	10	100118265	-0.496173	0.200047	0.0143794	FALSE
DMAp	rs11189574	G/A	10	100118596	-0.216424	0.131368	0.102644	FALSE
DMAp	rs11189577	C/A	10	100119093	-0.496173	0.200047	0.0143794	FALSE
DMAp	rs10883081	T/G	10	100120346	-0.232378	0.118178	0.052949	FALSE
DMAp	rs7894393	T/C	10	100120872	0.28478	0.165582	0.0874645	FALSE
DMAp	rs11814584	T/C	10	100123612	0.527003	0.192318	0.0072545	FALSE
DMAp	rs6584190	T/C	10	100124075	0.610437	0.176876	0.000917254	FALSE
DMAp	rs17109506	T/C	10	100126386	-0.527003	0.192318	0.0072545	FALSE
DMAp	rs17109550	C/A	10	100133931	0.651971	0.187063	0.000795755	FALSE
DMAp	rs7096654	T/C	10	100134036	0.556904	0.103373	9.32646e-07	FALSE
DMAp	rs17109581	T/A	10	100140636	-0.351269	0.231645	0.135041	FALSE
DMAp	rs7075655	G/A	10	100142068	-0.272555	0.111374	0.0159181	FALSE
DMAp	rs17109597	G/A	10	100142154	0.441648	0.115325	0.00023317	FALSE
DMAp	rs2296441	T/C	10	100144782	-0.411672	0.107618	0.000238881	FALSE
DMAp	rs2296439	G/C	10	100146771	-0.716909	0.197789	0.000509552	FALSE
DMAp	rs2296438	T/C	10	100146895	0.590515	0.0940207	1.29165e-08	FALSE
DMAp	rs4345897	G/A	10	100147060	-0.590515	0.0940207	1.29165e-08	FALSE
DMAp	rs4400721	G/A	10	100147097	0.421015	0.1093	0.000237431	FALSE
DMAp	rs2147897	T/G	10	100147813	-0.590515	0.0940207	1.29165e-08	FALSE
DMAp	rs4539242	T/C	10	100148058	0.655863	0.0897672	1.63483e-10	TRUE
DMAp	rs2147896	G/A	10	100148176	-0.655863	0.0897672	1.63483e-10	TRUE
DMAp	rs2182168	G/C	10	100148353	-0.590515	0.0940207	1.29165e-08	FALSE
DMAp	rs2274249	T/C	10	100148415	-0.608556	0.179584	0.00108664	FALSE
DMAp	rs2274248	T/C	10	100148542	-0.454689	0.114129	0.000138387	FALSE
DMAp	rs755126	G/A	10	100148951	0.590515	0.0940207	1.29165e-08	FALSE
DMAp	rs2274247	G/C	10	100150148	0.590515	0.0940207	1.29165e-08	FALSE
DMAp	rs17109620	G/A	10	100150938	0.716909	0.197789	0.000509552	FALSE
DMAp	rs10883084	T/C	10	100151189	0.590515	0.0940207	1.29165e-08	FALSE
DMAp	rs10786415	G/A	10	100151266	-0.650639	0.0903254	2.71229e-10	TRUE
DMAp	rs942814	G/A	10	100151305	-0.655863	0.0897672	1.63483e-10	TRUE
DMAp	rs7097824	T/A	10	100151799	-0.590515	0.0940207	1.29165e-08	FALSE
DMAp	rs7082192	T/C	10	100151844	0.590515	0.0940207	1.29165e-08	FALSE
DMAp	rs6584192	T/G	10	100152373	0.590515	0.0940207	1.29165e-08	FALSE
DMAp	rs11189586	G/A	10	100154096	-0.600029	0.0971457	1.9763e-08	FALSE
DMAp	rs11597425	T/G	10	100154202	-0.614379	0.0960088	7.09815e-09	FALSE
DMAp	rs11597428	G/C	10	100154247	0.614379	0.0960088	7.09815e-09	FALSE
DMAp	rs11189590	T/G	10	100154605	0.614379	0.0960088	7.09815e-09	FALSE
DMAp	rs10883085	T/A	10	100155613	-0.614379	0.0960088	7.09815e-09	FALSE
DMAp	rs11189592	C/A	10	100155642	0.454689	0.114129	0.000138387	FALSE
DMAp	rs17109634	T/C	10	100155793	-0.716909	0.197789	0.000509552	FALSE
DMAp	rs7907555	T/C	10	100155810	-0.614379	0.0960088	7.09815e-09	FALSE
DMAp	rs6584193	T/C	10	100155898	0.494528	0.122768	0.000110984	FALSE
DMAp	rs7924209	T/C	10	100155927	0.614379	0.0960088	7.09815e-09	FALSE
DMAp	rs7924303	T/C	10	100155963	0.614379	0.0960088	7.09815e-09	FALSE
DMAp	rs7908310	G/A	10	100156227	0.614379	0.0960088	7.09815e-09	FALSE
DMAp	rs7072216	T/C	10	100156853	0.655863	0.0897672	1.63483e-10	TRUE
DMAp	rs10883087	T/A	10	100156990	0.614379	0.0960088	7.09815e-09	FALSE
DMAp	rs10786418	T/C	10	100157368	-0.614379	0.0960088	7.09815e-09	FALSE
DMAp	rs4551689	T/C	10	100157593	0.614379	0.0960088	7.09815e-09	FALSE
DMAp	rs4488133	T/A	10	100159136	-0.655863	0.0897672	1.63483e-10	TRUE
DMAp	rs17109650	T/C	10	100159373	0.651027	0.194027	0.00122484	FALSE
DMAp	rs6584194	T/C	10	100160399	0.653767	0.0883437	8.6326e-11	TRUE
DMAp	rs17109653	T/C	10	100162151	0.766383	0.171879	2.56783e-05	FALSE
DMAp	rs17109657	G/C	10	100162695	0.766383	0.171879	2.56783e-05	FALSE
DMAp	rs10883089	C/A	10	100163120	-0.447653	0.118306	0.000272449	FALSE
DMAp	rs7897357	T/C	10	100163597	-0.624434	0.0989187	1.07212e-08	FALSE
DMAp	rs7914401	T/C	10	100163928	0.462272	0.12227	0.000311703	FALSE
DMAp	rs733345	T/G	10	100164215	-0.462272	0.12227	0.000311703	FALSE
DMAp	rs4474372	T/C	10	100164571	-0.462272	0.12227	0.000311703	FALSE
DMAp	rs4475861	T/C	10	100164989	-0.462272	0.12227	0.000311703	FALSE
DMAp	rs2147901	C/A	10	100165496	0.462272	0.12227	0.000311703	FALSE
DMAp	rs17109662	C/A	10	100165967	0.710886	0.186943	0.000258743	FALSE
DMAp	rs17455577	T/C	10	100165997	0.183292	0.12389	0.143069	FALSE
DMAp	rs7910973	G/A	10	100166732	0.462272	0.12227	0.000311703	FALSE
DMAp	rs7911036	T/A	10	100167015	-0.462272	0.12227	0.000311703	FALSE
DMAp	rs10883092	C/A	10	100167276	-0.479191	0.123372	0.000196479	FALSE
DMAp	rs12763326	G/A	10	100167396	0.462272	0.12227	0.000311703	FALSE
DMAp	rs12763379	G/A	10	100167466	0.462272	0.12227	0.000311703	FALSE
DMAp	rs942810	G/C	10	100167860	0.624434	0.0989187	1.07212e-08	FALSE
DMAp	rs17109675	T/C	10	100167951	0.710886	0.186943	0.000258743	FALSE
DMAp	rs942809	G/A	10	100168001	0.462272	0.12227	0.000311703	FALSE
DMAp	rs942808	C/A	10	100168102	0.462272	0.12227	0.000311703	FALSE
DMAp	rs942807	G/A	10	100168219	0.462272	0.12227	0.000311703	FALSE
DMAp	rs942806	G/A	10	100168248	0.462272	0.12227	0.000311703	FALSE
DMAp	rs942805	G/A	10	100168372	0.462272	0.12227	0.000311703	FALSE
DMAp	rs942804	C/A	10	100168499	0.462272	0.12227	0.000311703	FALSE
DMAp	rs942803	T/G	10	100168631	-0.462272	0.12227	0.000311703	FALSE
DMAp	rs9787550	T/C	10	100169051	-0.462272	0.12227	0.000311703	FALSE
DMAp	rs7923729	T/C	10	100169465	-0.462272	0.12227	0.000311703	FALSE
DMAp	rs9804285	T/C	10	100169472	-0.462272	0.12227	0.000311703	FALSE
DMAp	rs6584200	G/A	10	100170037	-0.462272	0.12227	0.000311703	FALSE
DMAp	rs6584202	G/A	10	100170383	0.462272	0.12227	0.000311703	FALSE
DMAp	rs7896828	T/A	10	100170507	-0.624434	0.0989187	1.07212e-08	FALSE
DMAp	rs3814140	T/C	10	100170762	-0.462272	0.12227	0.000311703	FALSE
DMAp	rs3814141	G/A	10	100171028	0.421918	0.12743	0.00128538	FALSE
DMAp	rs3814142	G/C	10	100171104	-0.462272	0.12227	0.000311703	FALSE
DMAp	rs10748729	G/C	10	100171371	0.462272	0.12227	0.000311703	FALSE
DMAp	rs7909131	G/A	10	100171471	-0.624434	0.0989187	1.07212e-08	FALSE
DMAp	rs7910247	T/C	10	100172252	-0.462272	0.12227	0.000311703	FALSE
DMAp	rs6584204	G/C	10	100173580	-0.462272	0.12227	0.000311703	FALSE
DMAp	rs3750601	C/A	10	100174561	0.462272	0.12227	0.000311703	FALSE
DMAp	rs2147900	T/C	10	100174721	0.462272	0.12227	0.000311703	FALSE
DMAp	rs2274244	G/A	10	100175218	-0.462272	0.12227	0.000311703	FALSE
DMAp	rs2274243	T/C	10	100175267	0.462272	0.12227	0.000311703	FALSE
DMAp	rs8181292	G/A	10	100175477	-0.462272	0.12227	0.000311703	FALSE
DMAp	rs3750604	G/A	10	100175581	0.421918	0.12743	0.00128538	FALSE
DMAp	rs3750605	T/C	10	100175654	-0.421918	0.12743	0.00128538	FALSE
DMAp	rs1061437	T/C	10	100176154	-0.462272	0.12227	0.000311703	FALSE
DMAp	rs1739	G/A	10	100176339	-0.624434	0.0989187	1.07212e-08	FALSE
DMAp	rs3830020	G/C	10	100176615	0.624434	0.0989187	1.07212e-08	FALSE
DMAp	rs3830019	T/C	10	100176848	-0.716909	0.197789	0.000509552	FALSE
DMAp	rs701801	T/C	10	100176869	-0.654649	0.10122	5.02051e-09	FALSE
DMAp	rs1061115	G/A	10	100177049	0.624434	0.0989187	1.07212e-08	FALSE
DMAp	rs11189600	T/C	10	100179274	-0.555065	0.104625	9.44986e-07	FALSE
DMAp	rs2296436	T/C	10	100179851	0.748674	0.172373	4.29938e-05	FALSE
DMAp	rs17109834	T/C	10	100181847	0.748674	0.172373	4.29938e-05	FALSE
DMAp	rs2296435	T/C	10	100182285	0.421918	0.12743	0.00128538	FALSE
DMAp	rs2296434	G/C	10	100183570	0.748674	0.172373	4.29938e-05	FALSE
DMAp	rs7921146	G/A	10	100186601	0.421918	0.12743	0.00128538	FALSE
DMAp	rs10883094	G/A	10	100188106	0.319778	0.127295	0.0134338	FALSE
DMAp	rs12242431	G/C	10	100189076	0.337489	0.183344	0.0694507	FALSE
DMAp	rs1061135	G/A	10	100189138	-0.23404	0.110205	0.0354995	FALSE
DMAp	rs1061134	G/A	10	100189252	0.366008	0.179817	0.0453209	FALSE
DMAp	rs11592273	C/A	10	100189568	0.0996184	0.203407	0.624946	FALSE
DMAp	rs2296431	T/C	10	100190264	0.0328809	0.108781	0.763079	FALSE
DMAp	rs1801287	G/A	10	100190920	0.0141098	0.115812	0.903799	FALSE
DMAp	rs11189602	G/C	10	100191495	0.100101	0.13099	0.447385	FALSE
DMAp	rs11599112	T/C	10	100191876	0.0544323	0.134168	0.685437	FALSE
DMAp	rs11599208	T/C	10	100192372	0.0416563	0.135658	0.759418	FALSE
DMAp	rs11595763	C/A	10	100193526	0.0416563	0.135658	0.759418	FALSE
DMAp	rs1886728	G/C	10	100193679	0.0314258	0.109738	0.775074	FALSE
DMAp	rs11591594	T/C	10	100193883	0.109573	0.141902	0.441048	FALSE
DMAp	rs17535384	G/A	10	100194602	0.0416563	0.135658	0.759418	FALSE
DMAp	rs11594426	T/C	10	100194829	-0.0416563	0.135658	0.759418	FALSE
DMAp	rs11594443	T/C	10	100194909	-0.0544323	0.134168	0.685437	FALSE
DMAp	rs11539873	G/A	10	100195130	0.677604	0.223856	0.00334633	FALSE
DMAp	rs2296430	T/A	10	100195583	0.00943922	0.125146	0.940169	FALSE
DMAp	rs7082038	C/A	10	100195886	0.0416563	0.135658	0.759418	FALSE
DMAp	rs7100143	T/C	10	100195973	-0.0416563	0.135658	0.759418	FALSE
DMAp	rs7082570	G/A	10	100195996	-0.0416563	0.135658	0.759418	FALSE
DMAp	rs11597139	T/A	10	100196020	0.0416563	0.135658	0.759418	FALSE
DMAp	rs11599696	C/A	10	100200064	0.0416563	0.135658	0.759418	FALSE
DMAp	rs11599712	G/A	10	100200149	0.0416563	0.135658	0.759418	FALSE
DMAp	rs7071947	G/A	10	100200797	-0.0314258	0.109738	0.775074	FALSE
DMAp	rs7909297	G/A	10	100201707	0.0416563	0.135658	0.759418	FALSE
DMAp	rs12249733	G/A	10	100203437	0.311194	0.220613	0.159519	FALSE
DMAp	rs10786422	T/C	10	100204727	-0.0141098	0.115812	0.903799	FALSE
DMAp	rs7075080	G/A	10	100212374	0.10214	0.107864	0.34508	FALSE
DMAp	rs10786423	T/C	10	100212671	-0.0371896	0.233888	0.873726	FALSE
DMAp	rs4611142	G/A	10	100216781	-0.00172198	0.11405	0.987999	FALSE
DMAp	rs4919228	G/A	10	100217572	-0.00172198	0.11405	0.987999	FALSE
DMAp	rs4917831	T/C	10	100217692	0.0835713	0.115744	0.471357	FALSE
DMAp	rs4917833	T/C	10	100217808	-0.024606	0.108078	0.820267	FALSE
DMAp	rs4917834	G/A	10	100217879	0.0098699	0.114042	0.931223	FALSE
DMAp	rs4917835	T/C	10	100217972	-0.0098699	0.114042	0.931223	FALSE
DMAp	rs4917836	C/A	10	100218059	0.0310395	0.116151	0.789895	FALSE
DMAp	rs10883098	G/C	10	100218195	-0.0098699	0.114042	0.931223	FALSE
DMAp	rs10786427	G/A	10	100218382	0.0098699	0.114042	0.931223	FALSE
DMAp	rs1060447	T/C	10	100218532	-0.0098699	0.114042	0.931223	FALSE
DMAp	rs1060446	G/C	10	100218721	-0.0098699	0.114042	0.931223	FALSE
DMAp	rs3179357	G/A	10	100218732	-0.0098699	0.114042	0.931223	FALSE
DMAp	rs1060445	T/C	10	100218766	-0.0098699	0.114042	0.931223	FALSE
DMAp	rs17457493	T/G	10	100218895	-0.776304	0.218675	0.000607072	FALSE
DMAp	rs10883099	G/A	10	100219314	0.0098699	0.114042	0.931223	FALSE
DMAp	rs10883100	T/A	10	100219374	0.0098699	0.114042	0.931223	FALSE
DMAp	rs11189618	G/A	10	100219519	0.0098699	0.114042	0.931223	FALSE
DMAp	rs11189619	T/C	10	100220012	-0.0098699	0.114042	0.931223	FALSE
DMAp	rs1925645	T/C	10	100220472	0.0098699	0.114042	0.931223	FALSE
DMAp	rs1925644	T/C	10	100220488	-0.0098699	0.114042	0.931223	FALSE
DMAp	rs17457603	T/A	10	100220928	0.0155261	0.13197	0.906611	FALSE
DMAp	rs754585	T/C	10	100224342	-0.024606	0.108078	0.820267	FALSE
DMAp	rs754586	T/C	10	100224362	0.0131542	0.104113	0.89955	FALSE
DMAp	rs7922362	T/C	10	100225502	-0.00172198	0.11405	0.987999	FALSE
DMAp	rs6584206	T/C	10	100225657	-0.00172198	0.11405	0.987999	FALSE
DMAp	rs1998757	G/C	10	100229506	0.0635916	0.132579	0.631683	FALSE
DMAp	rs1998756	T/C	10	100229532	-0.0608302	0.110586	0.582751	FALSE
DMAp	rs1998755	T/C	10	100229765	0.117661	0.114652	0.30545	FALSE
DMAp	rs6584209	T/C	10	100230982	0.0608302	0.110586	0.582751	FALSE
DMAp	rs11189627	T/G	10	100234276	0.0608302	0.110586	0.582751	FALSE
DMAp	rs7070118	T/C	10	100235520	-0.0774356	0.111363	0.487398	FALSE
DMAp	rs12265225	T/C	10	100236682	0.0774356	0.111363	0.487398	FALSE
DMAp	rs17458332	T/C	10	100240246	0.106431	0.170811	0.534022	FALSE
DMAp	rs17458353	G/A	10	100240305	-0.106608	0.147959	0.472403	FALSE
DMAp	rs10883108	G/A	10	100240334	0.0635916	0.132579	0.631683	FALSE
DMAp	rs11189628	T/C	10	100240681	0.0366763	0.124999	0.769638	FALSE
DMAp	rs10748732	T/C	10	100242039	-0.0944599	0.200501	0.638973	FALSE
DMAp	rs11189629	T/C	10	100242195	0.365747	0.212715	0.0889405	FALSE
DMAp	rs2764820	T/C	10	100243279	0.245317	0.199242	0.230236	FALSE
DMAp	rs12572945	G/A	10	100245092	0.0186531	0.125131	0.88234	FALSE
DMAp	rs4919231	G/A	10	100247590	-0.00307222	0.124117	0.98046	FALSE
DMAp	rs4442477	T/C	10	100249295	-0.0817924	0.105674	0.449514	FALSE
DMAp	rs1925647	C/A	10	100250186	0.0426359	0.13577	0.754189	FALSE
DMAp	rs10748733	T/C	10	100251388	-0.364148	0.204913	0.0795708	FALSE
DMAp	rs2017304	G/A	10	100251968	0.150269	0.107483	0.167922	FALSE
DMAp	rs11189634	C/A	10	100252658	0.150269	0.107483	0.167922	FALSE
DMAp	rs10883109	T/G	10	100257360	-0.245317	0.199242	0.230236	FALSE
DMAp	rs12779386	G/A	10	100263093	-0.00806113	0.125347	0.949113	FALSE
DMAp	rs10160114	T/C	10	100264844	0.245317	0.199242	0.230236	FALSE
DMAp	rs1932793	G/A	10	100267283	-0.245317	0.199242	0.230236	FALSE
DMAp	rs10786430	C/A	10	100267867	0.245317	0.199242	0.230236	FALSE
DMAp	rs1889974	G/A	10	100268520	0.118241	0.106325	0.274399	FALSE
DMAp	rs10883111	T/C	10	100272975	-0.112509	0.105188	0.291877	FALSE
DMAp	rs10883112	C/A	10	100273119	0.0883931	0.107795	0.417699	FALSE
DMAp	rs10786432	G/A	10	100273679	0.0594076	0.118095	0.616547	FALSE
DMAp	rs10883113	G/A	10	100273760	0.103003	0.104482	0.330814	FALSE
DMAp	rs11189646	T/C	10	100274999	-0.0594076	0.118095	0.616547	FALSE
DMAp	rs716838	T/C	10	100275412	0.0883931	0.107795	0.417699	FALSE
DMAp	rs10786434	C/A	10	100276039	0.194738	0.194875	0.326872	FALSE
DMAp	rs2169462	T/C	10	100277181	-0.194738	0.194875	0.326872	FALSE
DMAp	rs7919903	T/C	10	100277652	-0.194738	0.194875	0.326872	FALSE
DMAp	rs10748736	T/C	10	100277799	0.194738	0.194875	0.326872	FALSE
DMAp	rs10509722	T/C	10	100278017	0.194738	0.194875	0.326872	FALSE
DMAp	rs10883115	T/C	10	100278092	-0.194738	0.194875	0.326872	FALSE
DMAp	rs10736133	G/A	10	100278466	-0.194738	0.194875	0.326872	FALSE
DMAp	rs10509723	T/C	10	100278623	0.194738	0.194875	0.326872	FALSE
DMAp	rs4917837	G/A	10	100278857	0.194738	0.194875	0.326872	FALSE
DMAp	rs4919232	G/A	10	100278991	0.194738	0.194875	0.326872	FALSE
DMAp	rs4917838	T/C	10	100279323	-0.194738	0.194875	0.326872	FALSE
DMAp	rs1999789	G/C	10	100279998	-0.194738	0.194875	0.326872	FALSE
DMAp	rs7912749	T/C	10	100280107	-0.0594076	0.118095	0.616547	FALSE
DMAp	rs11594030	G/A	10	100280492	0.0697919	0.118226	0.55673	FALSE
DMAp	rs4919233	T/G	10	100283151	0.0594076	0.118095	0.616547	FALSE
DMAp	rs7923631	T/C	10	100284148	0.0594076	0.118095	0.616547	FALSE
DMAp	rs4919234	T/G	10	100286047	-0.0594076	0.118095	0.616547	FALSE
DMAp	rs4919235	G/C	10	100286138	-0.0594076	0.118095	0.616547	FALSE
DMAp	rs542386	C/A	10	100286160	0.0650922	0.217696	0.767204	FALSE
DMAp	rs563823	G/A	10	100287607	0.00191286	0.214329	0.992871	FALSE
DMAp	rs560228	T/C	10	100287958	0.0396014	0.207071	0.848384	FALSE
DMAp	rs557326	T/C	10	100288305	0.0396014	0.207071	0.848384	FALSE
DMAp	rs534666	G/A	10	100288452	0.00191286	0.214329	0.992871	FALSE
DMAp	rs616979	G/A	10	100289101	0.0446185	0.227522	0.845454	FALSE
DMAp	rs11189651	T/G	10	100289199	0.0582896	0.121256	0.631967	FALSE
DMAp	rs12358472	C/A	10	100290770	0.0582896	0.121256	0.631967	FALSE
DMAp	rs577969	T/C	10	100291176	0.0446185	0.227522	0.845454	FALSE
DMAp	rs1462134	G/C	10	100291583	-0.0452521	0.105772	0.670155	FALSE
DMAp	rs682247	T/C	10	100291718	-0.0396014	0.207071	0.848384	FALSE
DMAp	rs680488	C/A	10	100292080	-0.0446185	0.227522	0.845454	FALSE
DMAp	rs922324	C/A	10	100292627	-0.081646	0.107575	0.451426	FALSE
DMAp	rs11189652	G/A	10	100292977	-0.0452521	0.105772	0.670155	FALSE
DMAp	rs4917840	T/A	10	100293029	0.0582896	0.121256	0.631967	FALSE
DMAp	rs665142	T/C	10	100293182	0.0396014	0.207071	0.848384	FALSE
DMAp	rs898892	T/G	10	100293700	0.0582896	0.121256	0.631967	FALSE
DMAp	rs10883118	G/A	10	100293897	0.0582896	0.121256	0.631967	FALSE
DMAp	rs1809320	G/A	10	100294255	0.0582896	0.121256	0.631967	FALSE
DMAp	rs573677	G/A	10	100294517	-0.0446185	0.227522	0.845454	FALSE
DMAp	rs567137	T/C	10	100295225	-0.0396014	0.207071	0.848384	FALSE
DMAp	rs542431	T/C	10	100295624	-0.0396014	0.207071	0.848384	FALSE
DMAp	rs536221	T/C	10	100296252	0.0446185	0.227522	0.845454	FALSE
DMAp	rs10748737	T/C	10	100299587	-0.0396014	0.207071	0.848384	FALSE
DMAp	rs10786436	T/C	10	100300182	-0.0400663	0.11356	0.725318	FALSE
DMAp	rs11189671	T/A	10	100307715	0.00143402	0.104173	0.989021	FALSE
DMAp	rs12355571	T/C	10	100308507	0.0452521	0.105772	0.670155	FALSE
DMAp	rs584705	G/A	10	100308644	0.0396014	0.207071	0.848384	FALSE
DMAp	rs584744	G/A	10	100308667	-0.0396014	0.207071	0.848384	FALSE
DMAp	rs508451	T/C	10	100310412	0.00206897	0.170423	0.990389	FALSE
DMAp	rs621644	G/A	10	100311667	0.0280318	0.112396	0.803532	FALSE
DMAp	rs2018085	G/C	10	100313042	-0.0286023	0.104688	0.78524	FALSE
DMAp	rs650527	T/C	10	100313563	-0.0213849	0.112867	0.850047	FALSE
DMAp	rs490590	T/C	10	100313810	-0.0396014	0.207071	0.848384	FALSE
DMAp	rs486792	T/C	10	100314216	-0.0446185	0.227522	0.845454	FALSE
DMAp	rs7907389	G/A	10	100314339	0.0371321	0.121013	0.759477	FALSE
DMAp	rs666243	G/A	10	100314818	-0.0396014	0.207071	0.848384	FALSE
DMAp	rs10509724	T/C	10	100315552	-0.0396014	0.207071	0.848384	FALSE
DMAp	rs540477	T/C	10	100315775	0.0446185	0.227522	0.845454	FALSE
DMAp	rs539559	T/C	10	100315885	0.0396014	0.207071	0.848384	FALSE
DMAp	rs513809	T/A	10	100316404	-0.0396014	0.207071	0.848384	FALSE
DMAp	rs7097086	G/A	10	100317043	0.0213849	0.112867	0.850047	FALSE
DMAp	rs10883130	T/C	10	100318067	0.0453685	0.105636	0.66872	FALSE
DMAp	rs541519	G/A	10	100318436	0.0396014	0.207071	0.848384	FALSE
DMAp	rs543093	G/A	10	100318556	0.0446185	0.227522	0.845454	FALSE
DMAp	rs10748739	T/C	10	100318693	-0.0371321	0.121013	0.759477	FALSE
DMAp	rs489611	T/C	10	100318793	0.0213849	0.112867	0.850047	FALSE
DMAp	rs17538604	T/C	10	100319919	-0.0396014	0.207071	0.848384	FALSE
DMAp	rs660426	T/C	10	100320131	0.0396014	0.207071	0.848384	FALSE
DMAp	rs11189677	G/C	10	100320226	0.0286023	0.104688	0.78524	FALSE
DMAp	rs10883131	G/C	10	100320500	0.0286023	0.104688	0.78524	FALSE
DMAp	rs471563	T/C	10	100321965	-0.0396014	0.207071	0.848384	FALSE
DMAp	rs472459	T/C	10	100322061	-0.0396014	0.207071	0.848384	FALSE
DMAp	rs477950	T/C	10	100322658	-0.075793	0.183492	0.680018	FALSE
DMAp	rs500329	G/A	10	100322787	0.0446185	0.227522	0.845454	FALSE
DMAp	rs501282	T/C	10	100322901	0.0396014	0.207071	0.848384	FALSE
DMAp	rs598076	G/A	10	100323387	0.0396014	0.207071	0.848384	FALSE
DMAp	rs505981	T/C	10	100323444	0.0396014	0.207071	0.848384	FALSE
DMAp	rs610884	T/C	10	100323941	0.0396014	0.207071	0.848384	FALSE
DMAp	rs11815889	C/A	10	100324001	0.0371321	0.121013	0.759477	FALSE
DMAp	rs611806	T/G	10	100324151	0.0396014	0.207071	0.848384	FALSE
DMAp	rs535182	T/C	10	100324333	-0.0396014	0.207071	0.848384	FALSE
DMAp	rs535927	T/C	10	100324376	0.0396014	0.207071	0.848384	FALSE
DMAp	rs536955	T/C	10	100324506	0.0396014	0.207071	0.848384	FALSE
DMAp	rs537790	G/A	10	100324561	-0.0396014	0.207071	0.848384	FALSE
DMAp	rs537851	T/C	10	100324581	-0.0396014	0.207071	0.848384	FALSE
DMAp	rs538873	G/A	10	100324734	0.0396014	0.207071	0.848384	FALSE
DMAp	rs538876	T/C	10	100324739	-0.0396014	0.207071	0.848384	FALSE
DMAp	rs614927	G/A	10	100324856	-0.0396014	0.207071	0.848384	FALSE
DMAp	rs628037	T/C	10	100325515	0.0446185	0.227522	0.845454	FALSE
DMAp	rs552644	T/G	10	100325645	-0.0396014	0.207071	0.848384	FALSE
DMAp	rs629789	T/C	10	100325885	0.0396014	0.207071	0.848384	FALSE
DMAp	rs10883134	G/A	10	100326006	0.0286023	0.104688	0.78524	FALSE
DMAp	rs544176	T/C	10	100326593	0.0396014	0.207071	0.848384	FALSE
DMAp	rs522425	T/C	10	100326616	-0.0396014	0.207071	0.848384	FALSE
DMAp	rs10883135	T/G	10	100326668	-0.0371321	0.121013	0.759477	FALSE
DMAp	rs521390	T/A	10	100326753	-0.0396014	0.207071	0.848384	FALSE
DMAp	rs520329	T/C	10	100326904	0.0396014	0.207071	0.848384	FALSE
DMAp	rs519482	G/A	10	100326970	0.0396014	0.207071	0.848384	FALSE
DMAp	rs657442	C/A	10	100327425	0.0396014	0.207071	0.848384	FALSE
DMAp	rs658346	T/C	10	100327651	0.0396014	0.207071	0.848384	FALSE
DMAp	rs568622	G/A	10	100327667	0.0396014	0.207071	0.848384	FALSE
DMAp	rs669987	T/C	10	100327996	-0.0396014	0.207071	0.848384	FALSE
DMAp	rs563937	G/A	10	100328205	0.0396014	0.207071	0.848384	FALSE
DMAp	rs671210	T/C	10	100328257	-0.141591	0.201203	0.482719	FALSE
DMAp	rs671244	G/A	10	100328288	-0.0396014	0.207071	0.848384	FALSE
DMAp	rs10786442	G/A	10	100329154	0.0396014	0.207071	0.848384	FALSE
DMAp	rs531002	T/C	10	100329481	0.0396014	0.207071	0.848384	FALSE
DMAp	rs504600	G/C	10	100330042	0.0396014	0.207071	0.848384	FALSE
DMAp	rs609234	G/A	10	100330169	0.0396014	0.207071	0.848384	FALSE
DMAp	rs610498	G/A	10	100330451	-0.00903035	0.112541	0.936118	FALSE
DMAp	rs10748743	T/A	10	100330502	-0.0371321	0.121013	0.759477	FALSE
DMAp	rs500088	T/C	10	100330515	0.0396014	0.207071	0.848384	FALSE
DMAp	rs500028	G/C	10	100330535	0.0396014	0.207071	0.848384	FALSE
DMAp	rs472241	T/A	10	100331241	-0.0396014	0.207071	0.848384	FALSE
DMAp	rs625777	C/A	10	100331520	0.0396014	0.207071	0.848384	FALSE
DMAp	rs552436	G/C	10	100332256	0.0396014	0.207071	0.848384	FALSE
DMAp	rs551674	T/C	10	100332296	0.0396014	0.207071	0.848384	FALSE
DMAp	rs549654	G/A	10	100332552	0.0396014	0.207071	0.848384	FALSE
DMAp	rs527822	G/C	10	100332616	-0.0396014	0.207071	0.848384	FALSE
DMAp	rs526877	G/C	10	100332713	0.0396014	0.207071	0.848384	FALSE
DMAp	rs526698	T/C	10	100332775	0.0396014	0.207071	0.848384	FALSE
DMAp	rs1381549	T/G	10	100332801	0.0446185	0.227522	0.845454	FALSE
DMAp	rs523205	T/A	10	100333100	-0.0396014	0.207071	0.848384	FALSE
DMAp	rs522067	G/A	10	100333290	0.0396014	0.207071	0.848384	FALSE
DMAp	rs2485029	T/G	10	100333825	-0.0396014	0.207071	0.848384	FALSE
DMAp	rs605591	G/A	10	100334239	-0.0396014	0.207071	0.848384	FALSE
DMAp	rs605113	T/C	10	100334369	-0.0396014	0.207071	0.848384	FALSE
DMAp	rs604761	T/G	10	100334390	-0.0396014	0.207071	0.848384	FALSE
DMAp	rs489289	G/A	10	100334533	0.0396014	0.207071	0.848384	FALSE
DMAp	rs576770	C/A	10	100334706	0.0396014	0.207071	0.848384	FALSE
DMAp	rs592142	G/A	10	100334898	0.0396014	0.207071	0.848384	FALSE
DMAp	rs573821	G/A	10	100335093	-0.0396014	0.207071	0.848384	FALSE
DMAp	rs4147142	T/C	10	100335865	0.0505806	0.172256	0.770554	FALSE
DMAp	rs4919244	T/C	10	100336680	-0.0505806	0.172256	0.770554	FALSE
DMAp	rs4919245	G/A	10	100336769	-0.0505806	0.172256	0.770554	FALSE
DMAp	rs3853516	C/A	10	100338139	-0.0657178	0.107201	0.541973	FALSE
DMAp	rs7083561	G/C	10	100338879	0.0657178	0.107201	0.541973	FALSE
DMAp	rs3936941	T/G	10	100339741	-0.0167097	0.174698	0.924105	FALSE
DMAp	rs10883139	T/C	10	100339862	0.0657178	0.107201	0.541973	FALSE
DMAp	rs10883140	T/C	10	100340086	-0.0583945	0.121064	0.630513	FALSE
DMAp	rs1932803	T/C	10	100342333	0.0966072	0.108392	0.374448	FALSE
DMAp	rs10786444	G/C	10	100342794	0.0821356	0.106664	0.443241	FALSE
DMAp	rs4917845	C/A	10	100342837	0.0429934	0.120238	0.721439	FALSE
DMAp	rs11189691	G/C	10	100343408	0.0689105	0.110822	0.535449	FALSE
DMAp	rs1111289	T/C	10	100343534	-0.045993	0.115621	0.691713	FALSE
DMAp	rs10736134	T/C	10	100344124	-0.13303	0.22578	0.556063	FALSE
DMAp	rs11189692	T/C	10	100344136	-0.103748	0.155018	0.503828	FALSE
DMAp	rs10786445	T/C	10	100344209	0.0880668	0.111159	0.430382	FALSE
DMAp	rs10883141	T/C	10	100344439	0.0689105	0.110822	0.535449	FALSE
DMAp	rs10883142	T/C	10	100344481	0.0880668	0.111159	0.430382	FALSE
DMAp	rs11189693	G/C	10	100344692	-0.100743	0.107275	0.350468	FALSE
DMAp	rs11189694	T/C	10	100344905	-0.0880668	0.111159	0.430382	FALSE
DMAp	rs11189698	T/C	10	100345376	0.0689105	0.110822	0.535449	FALSE
DMAp	rs10786446	T/C	10	100345973	-0.0880668	0.111159	0.430382	FALSE
DMAp	rs2184817	T/C	10	100346589	-0.0429933	0.120239	0.721439	FALSE
DMAp	rs17460851	G/A	10	100346675	0.0779301	0.222819	0.726695	FALSE
DMAp	rs6584214	T/C	10	100347450	-0.13303	0.22578	0.556063	FALSE
DMAp	rs3911759	T/C	10	100347848	0.0779301	0.222819	0.726695	FALSE
DMAp	rs12268248	G/A	10	100347919	0.0880668	0.111159	0.430382	FALSE
DMAp	rs3866908	G/A	10	100347968	0.13303	0.22578	0.556063	FALSE
DMAp	rs10786447	T/C	10	100348138	0.0429934	0.120238	0.721439	FALSE
DMAp	rs675410	G/A	10	100350322	0.091836	0.236727	0.698208	FALSE
DMAp	rs10883146	T/C	10	100350338	0.0759134	0.112951	0.502825	FALSE
DMAp	rs7099621	T/C	10	100352786	-0.0317626	0.114707	0.782119	FALSE
DMAp	rs12244614	T/G	10	100353616	-0.157349	0.24935	0.528451	FALSE
DMAp	rs7090780	T/G	10	100358291	-0.0335296	0.11784	0.776299	FALSE
DMAp	rs502195	T/C	10	100359463	-0.0789982	0.205376	0.700658	FALSE
